# Supplementary material for: Design and Synthesis of Novel Pyridine-Based Compounds as Potential PIM-1 Kinase Inhibitors, Apoptosis, and Autophagy Inducers Targeting MCF-7 Cell Lines: In Vitro and In Vivo Studies
Source: PubMed Central journal article supplement — ACS Omega. 2023 Nov 27;8(49):46922–33. doi: 10.1021/acsomega.3c06700 (PMC10720030; doi:10.1021/acsomega.3c06700), 2023-11-27
Supplement: ao3c06700_si_001.pdf [file ao3c06700_si_001.pdf]

## Supporting Information to

### **Design and synthesis of novel pyridine-based compounds as potential PIM-1 kinase inhibitors, apoptosis, and autophagy inducers targeting MCF-7 cell lines: *In vitro* and *In vivo* studies.**

Shrouk M. Shaban<sup>1</sup>, Elsayed H. Eltamany<sup>1</sup>, Ahmed T. A. Boraei<sup>1\*</sup>, Mohamed S. Nafie<sup>1,2\*</sup>, Emad M. Gad<sup>1</sup>

<sup>1</sup>Chemistry Department, Faculty of Science, Suez Canal University, Ismailia 41522, Egypt

<sup>2</sup> Department of Chemistry, College of Sciences, University of Sharjah, Sharjah (P.O. Box 27272), United Arab Emirates.

**Corresponding Authors emails:** Chemistry Department, Faculty of Science, Suez Canal University, Ismailia 41522, Egypt.  
[ahmed\\_tawfeek83@yahoo.com](mailto:ahmed_tawfeek83@yahoo.com) (ATAB), [mohamed\\_nafie@science.suez.edu.eg](mailto:mohamed_nafie@science.suez.edu.eg) (MSN)

# NMR Spectra

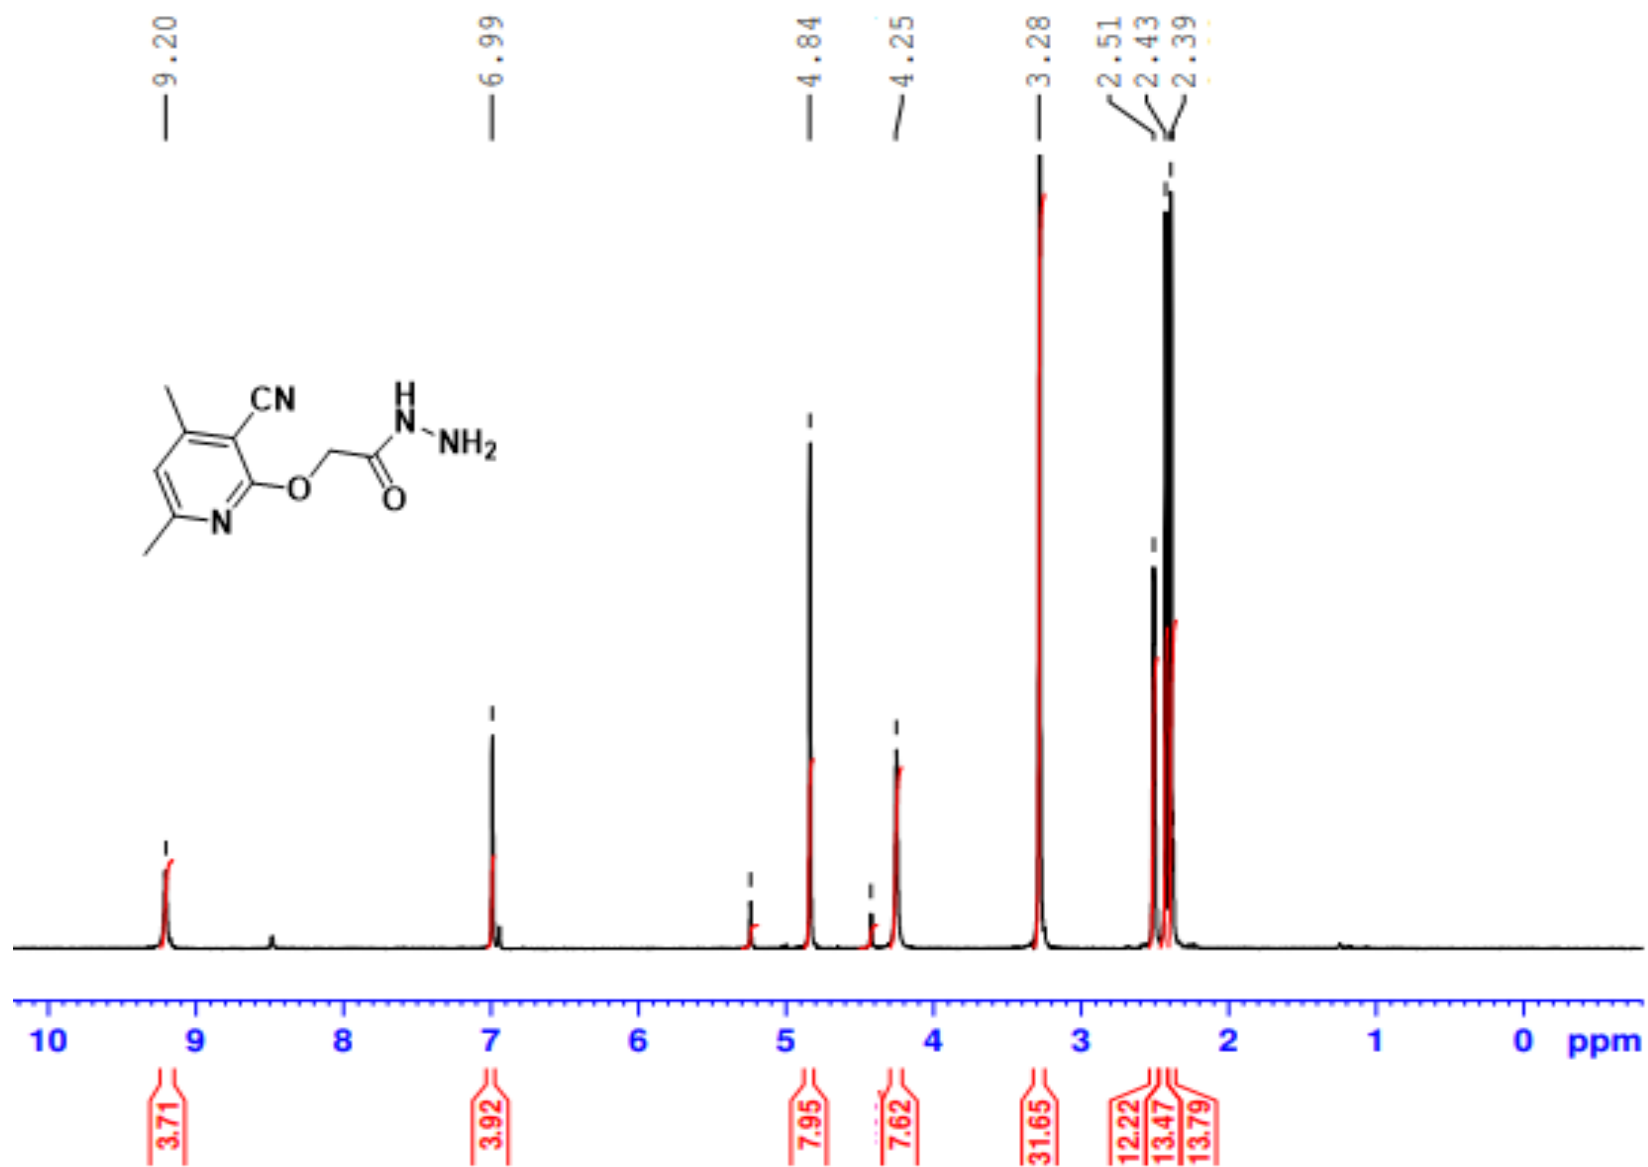

Fig.S1 : <sup>1</sup>H-NMR (DMSO-*d*<sub>6</sub>)spectrum of compound 1

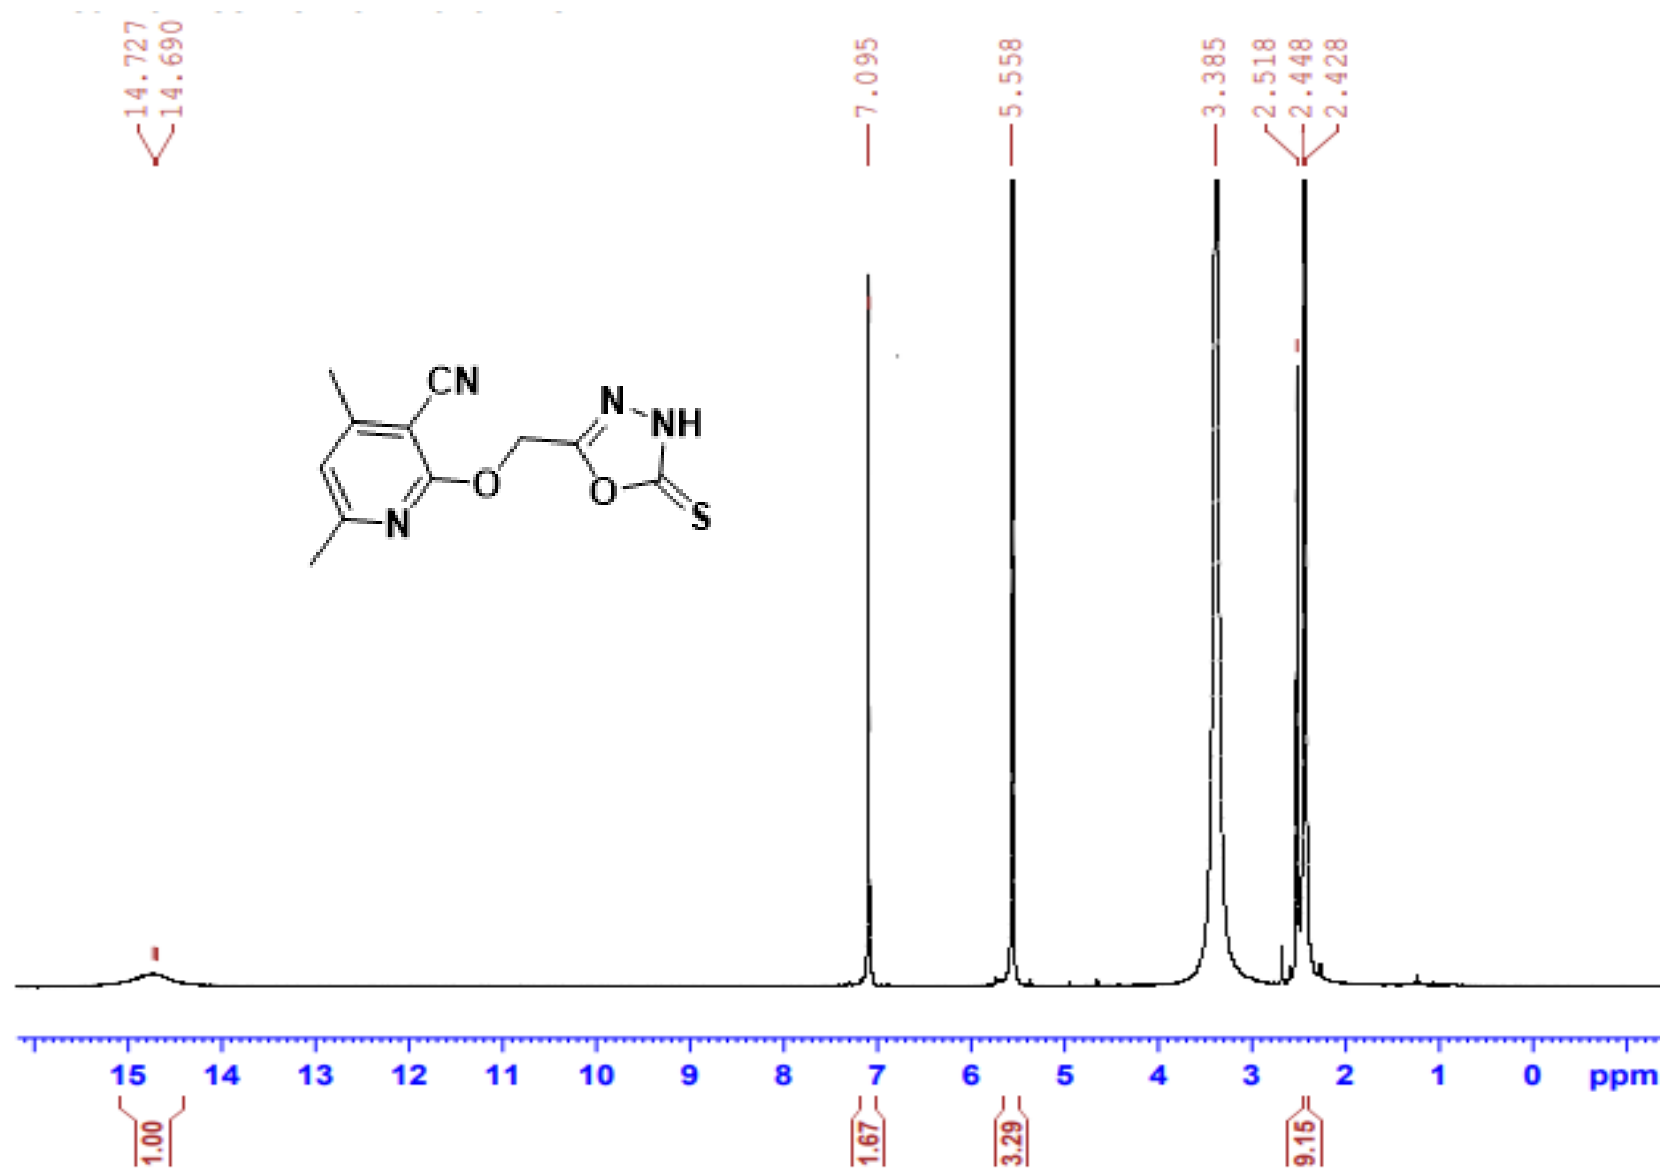

Fig.S2 : <sup>1</sup>H-NMR (DMSO-d<sub>6</sub>) spectrum of compound 2

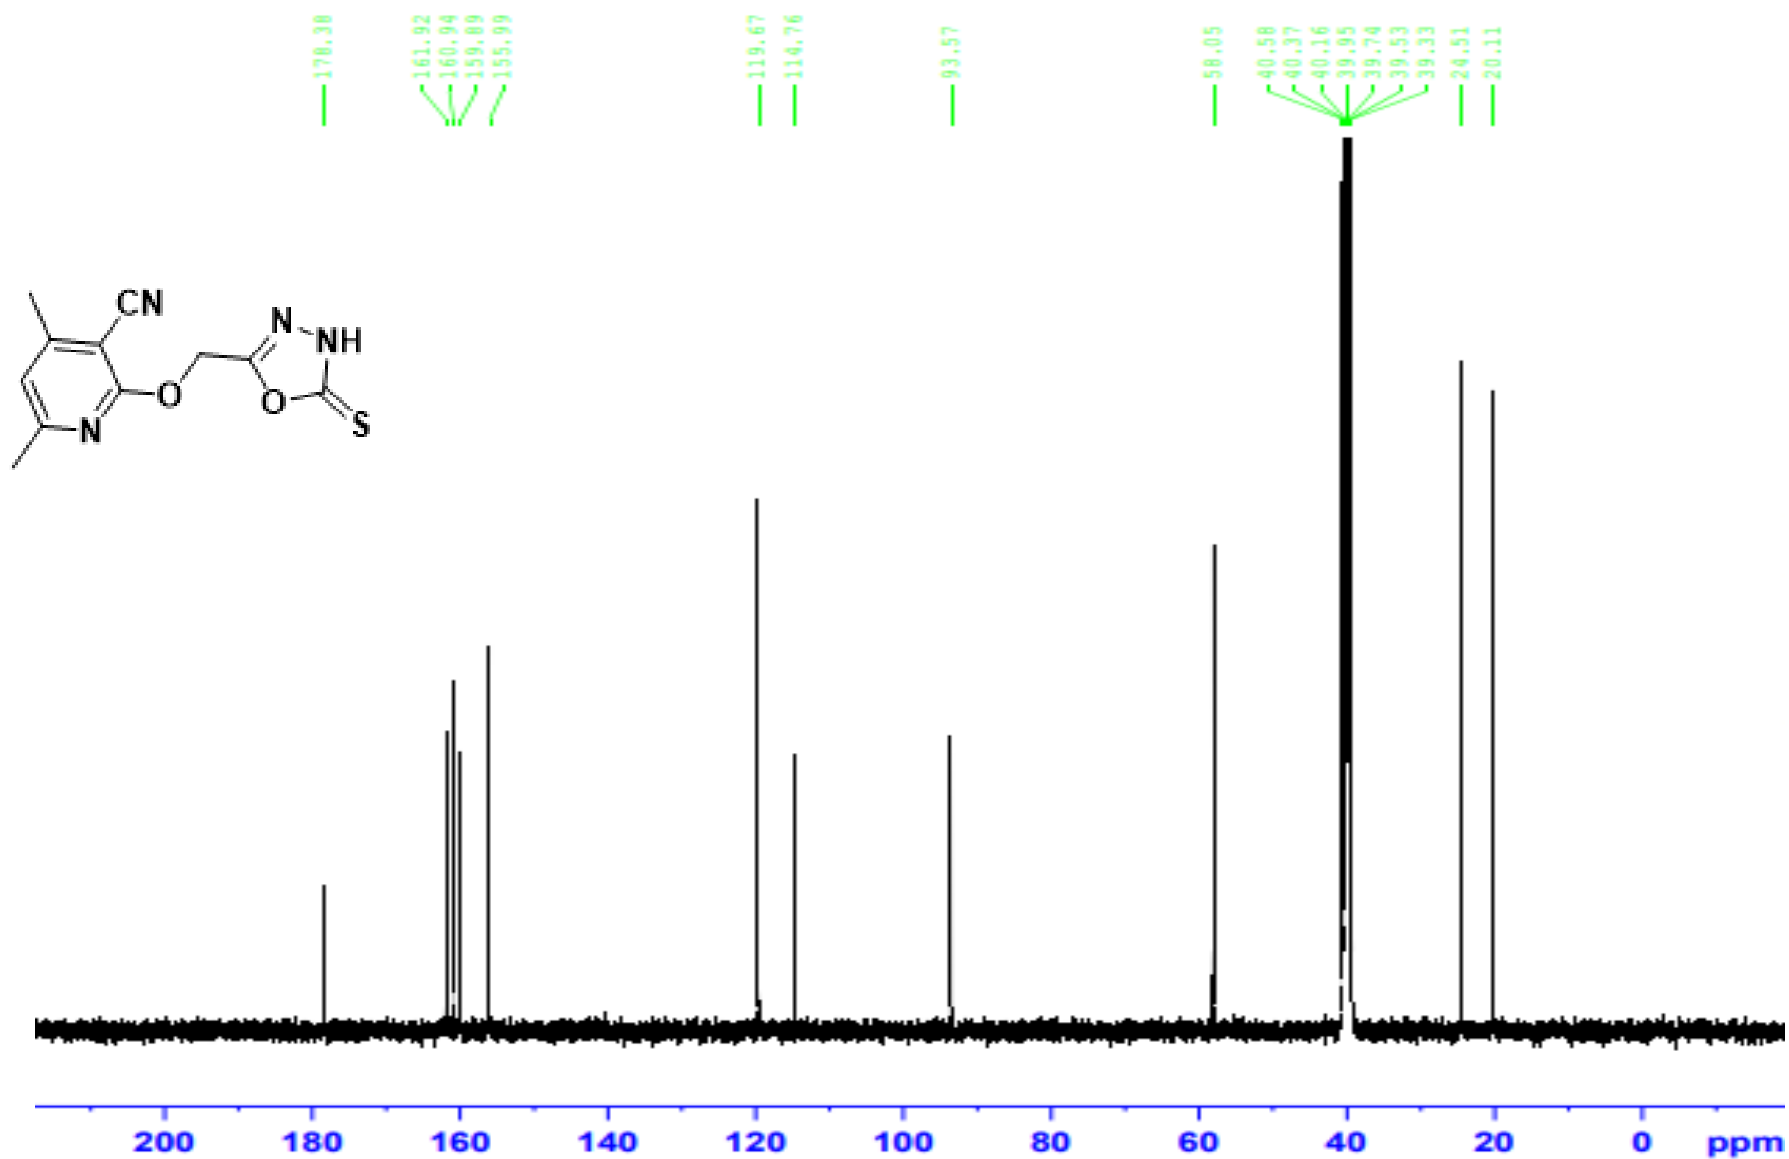

Fig.S3 : <sup>13</sup>C-NMR (DMSO-d<sub>6</sub>) spectrum of compound 2

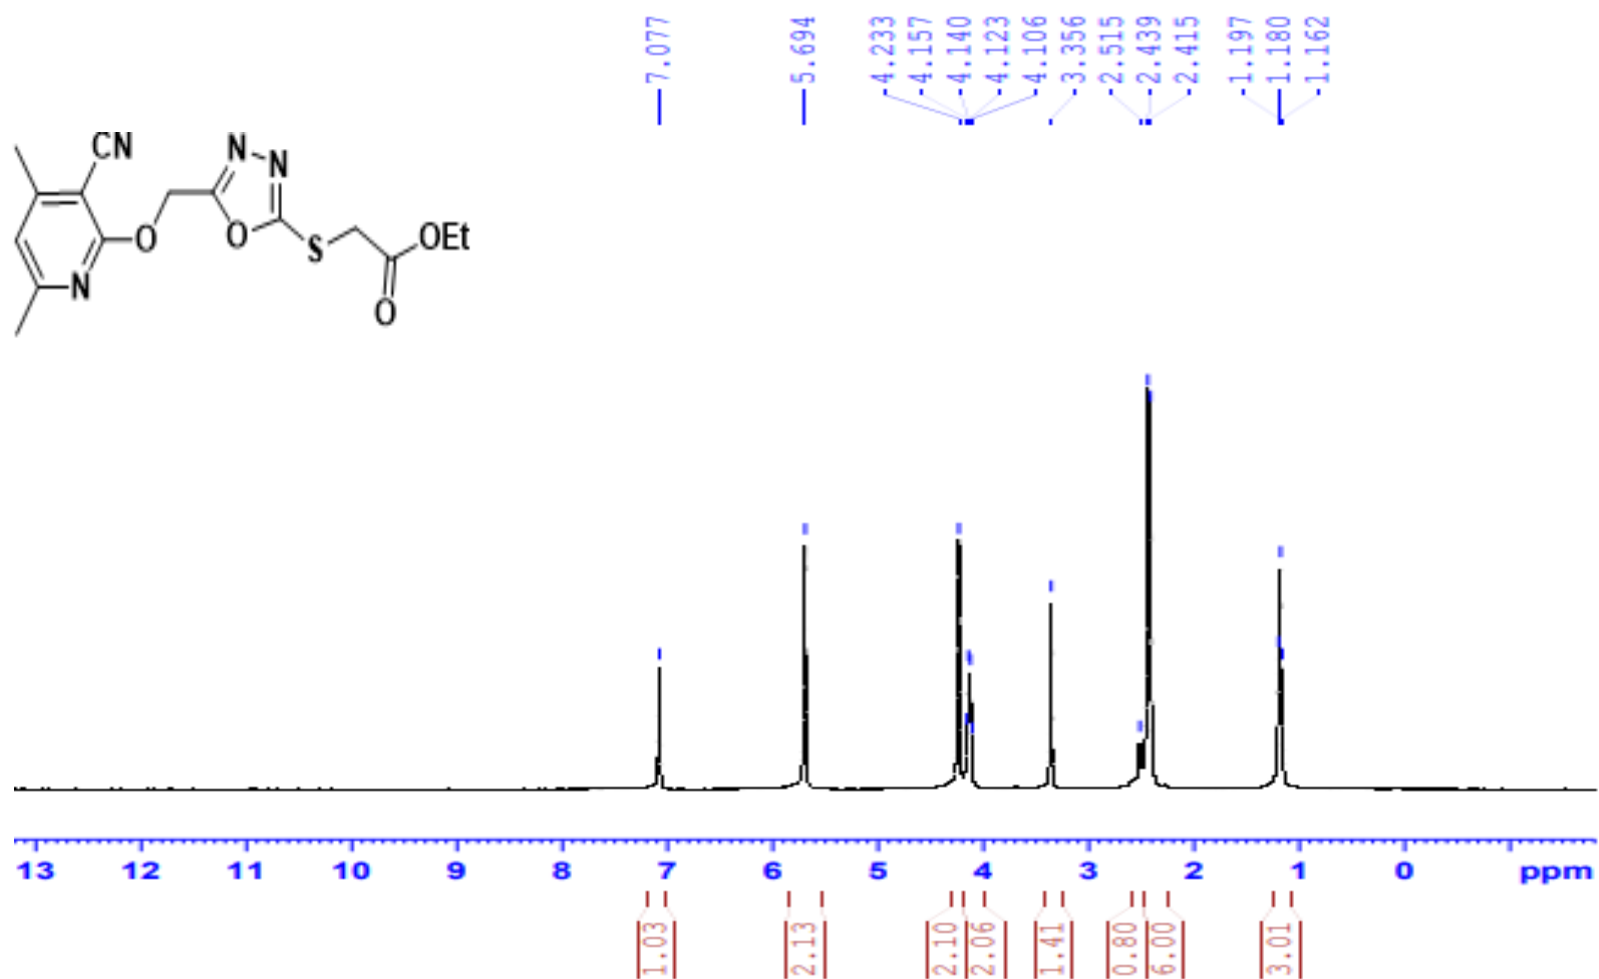

Fig.S4 :  $^1\text{H-NMR}$  (DMSO- $d_6$ ) spectrum of compound 3

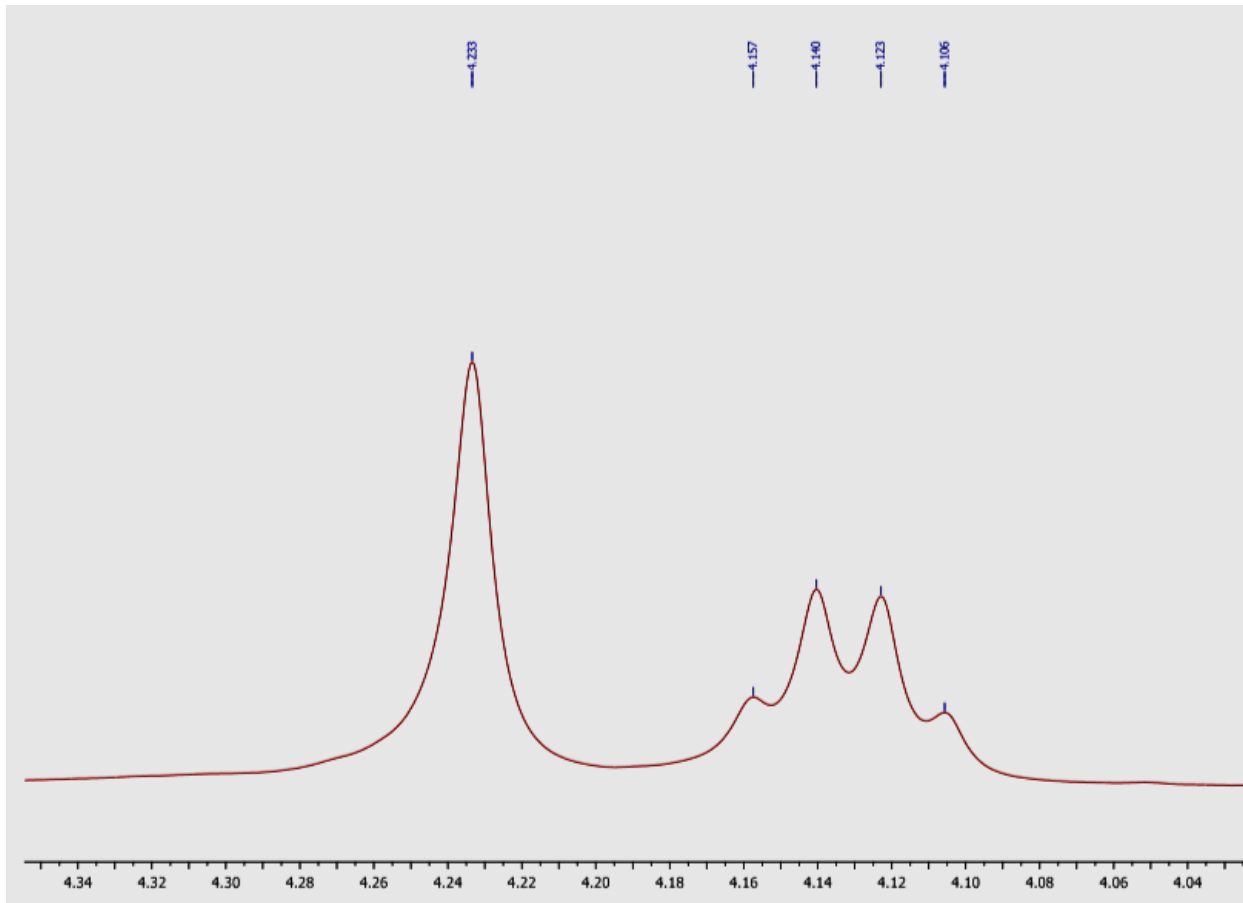

**zoomed image**

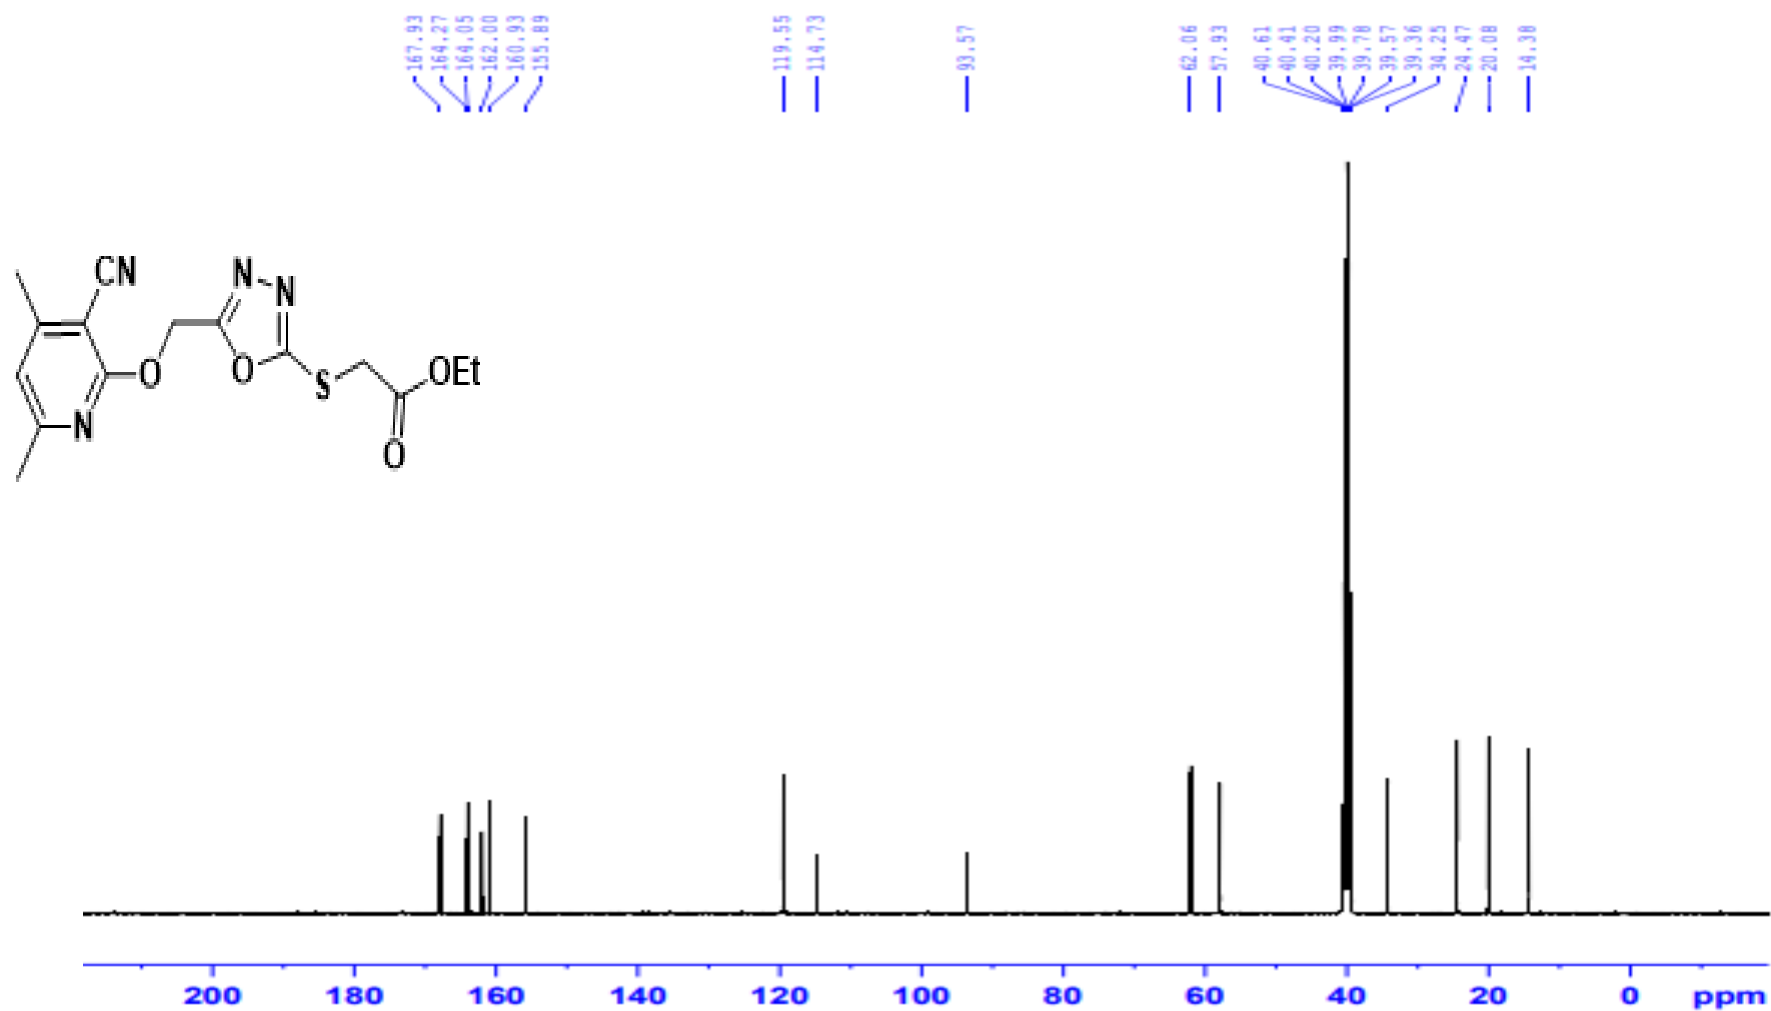

Fig.S5 : <sup>13</sup>C-NMR (DMSO-d<sub>6</sub>) spectrum of compound 3

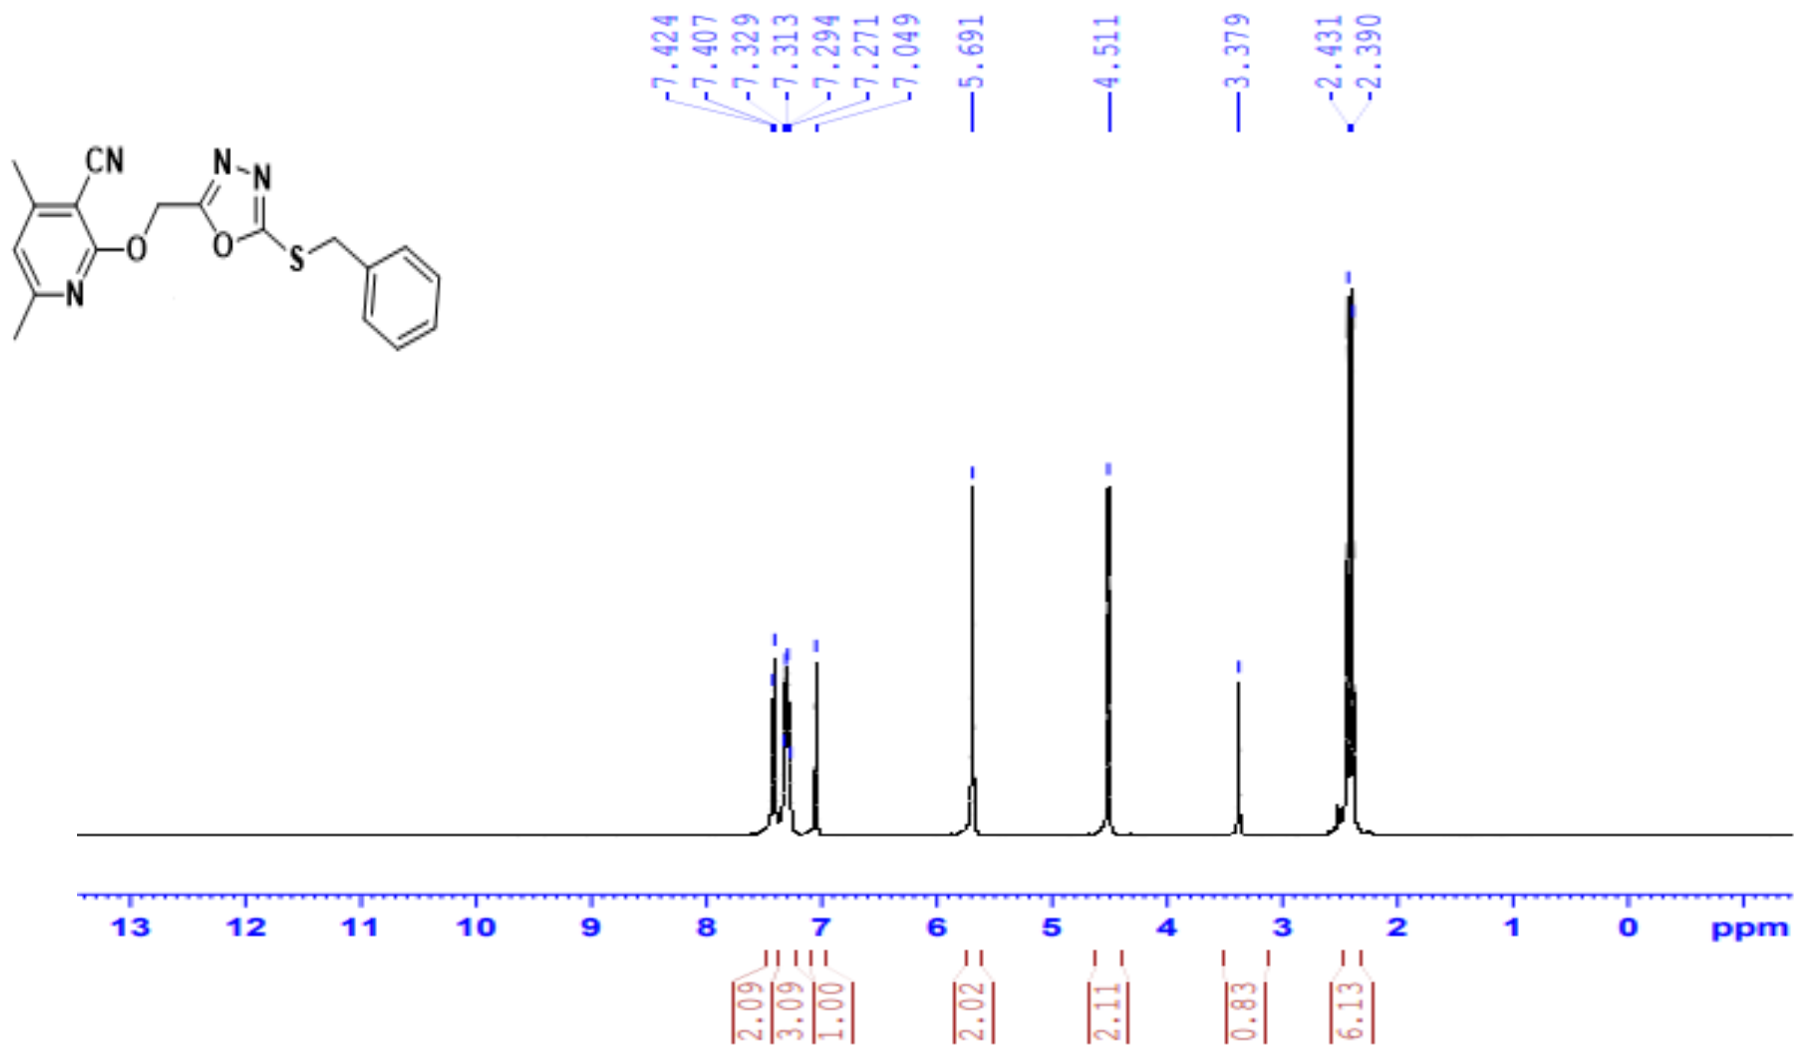

Fig.S6 : <sup>1</sup>H-NMR (DMSO-d<sub>6</sub>) spectrum of compound 4



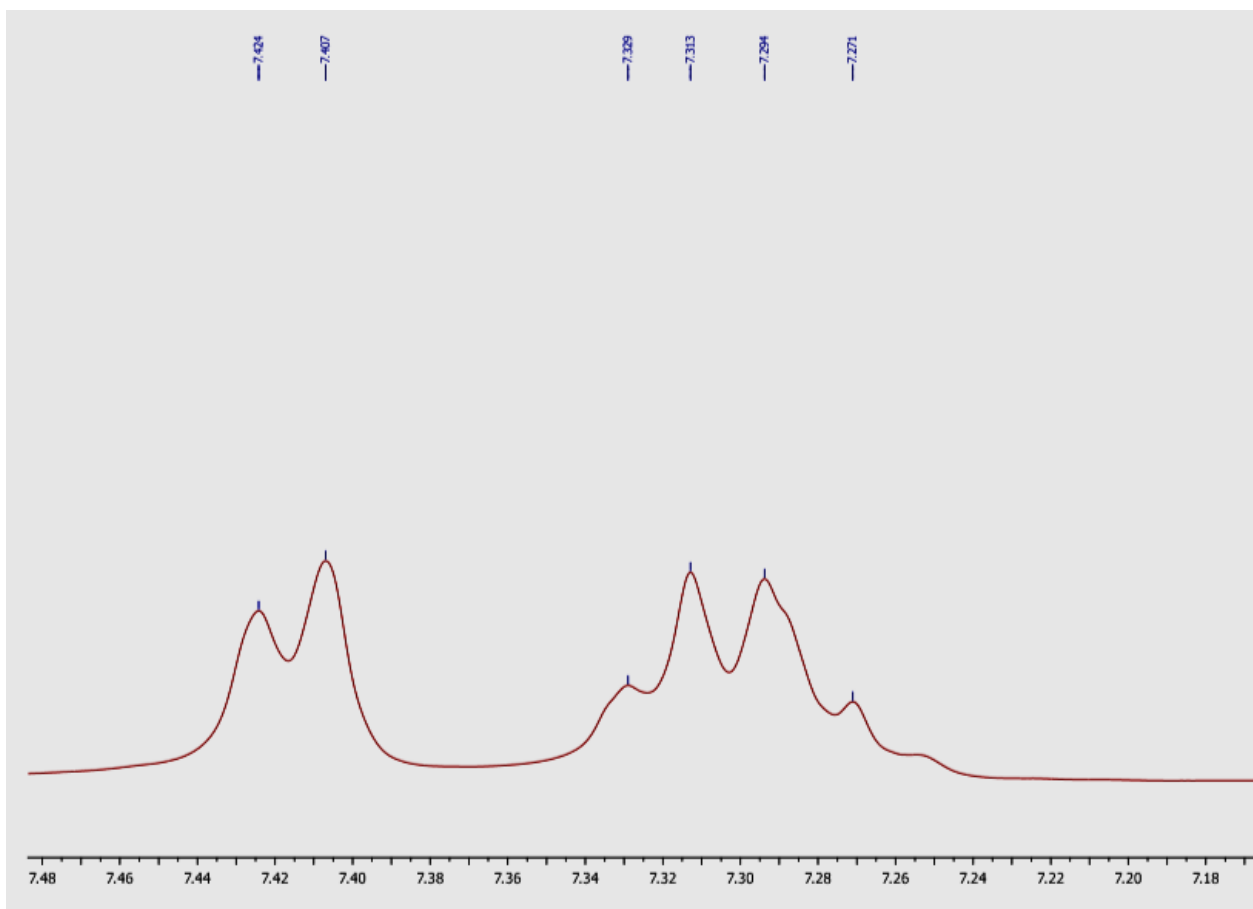

zoomed image

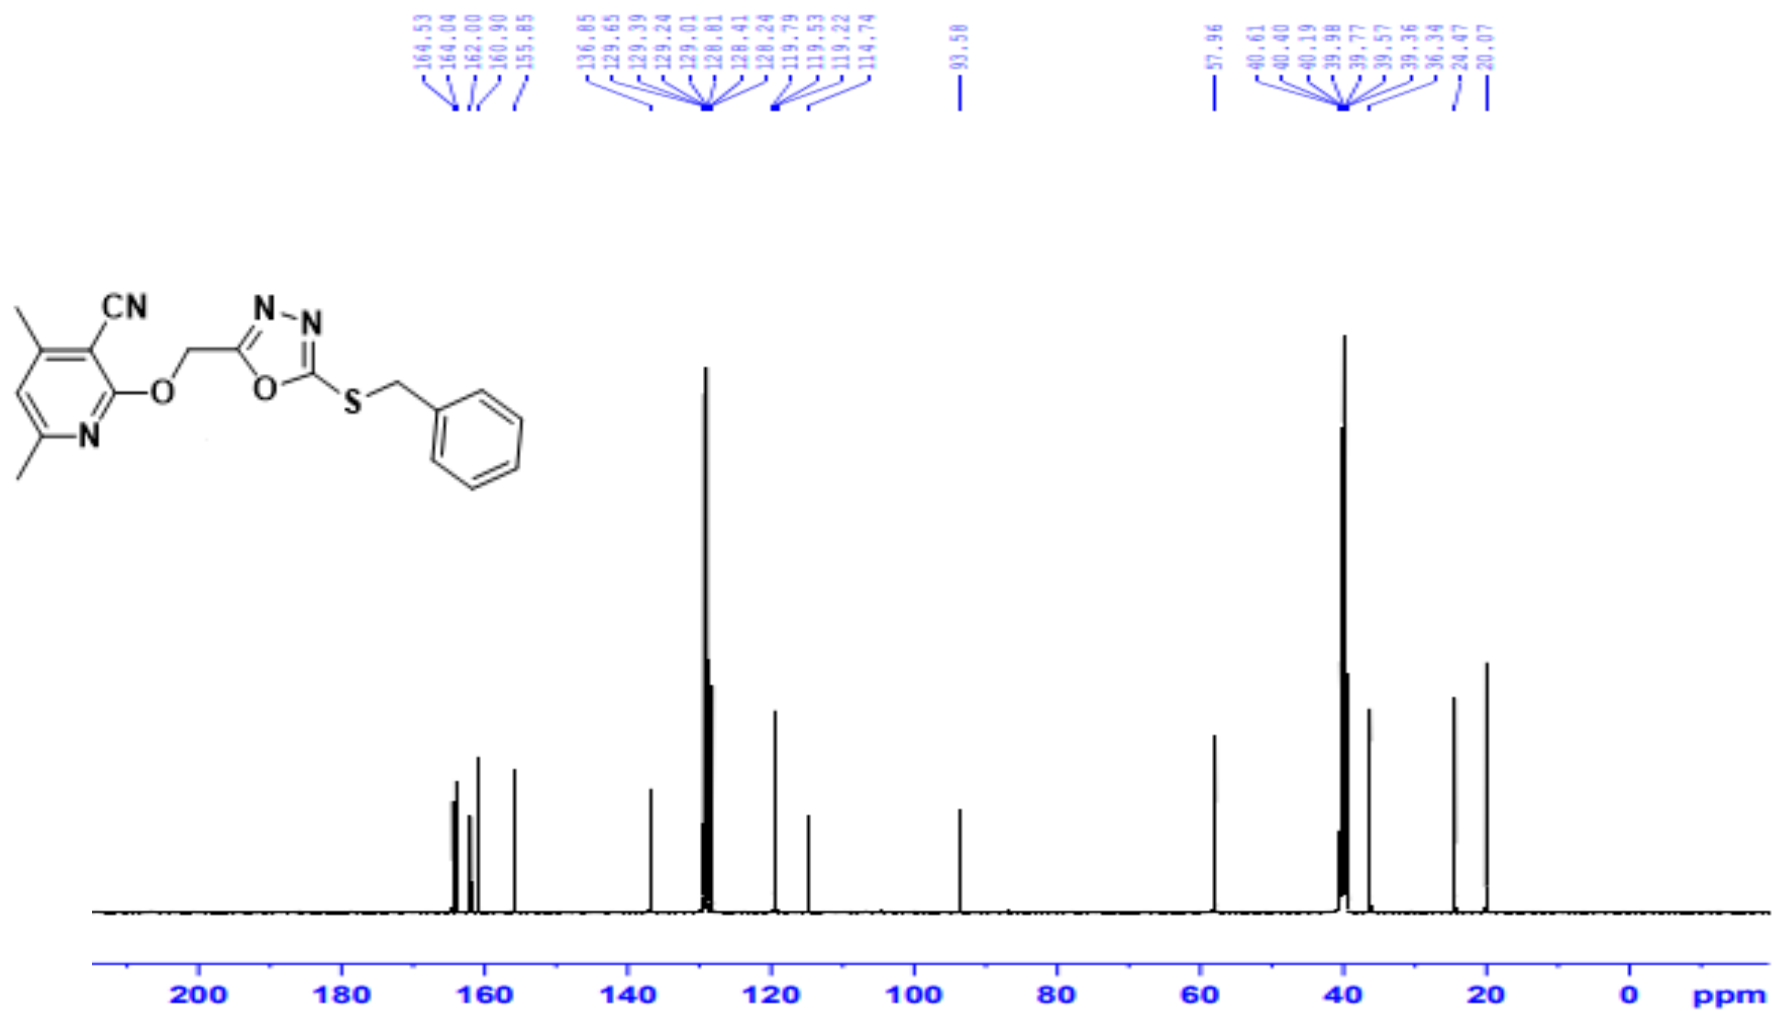

Fig.S7 :  $^{13}\text{C-NMR}$  (DMSO- $d_6$ ) spectrum of compound 4

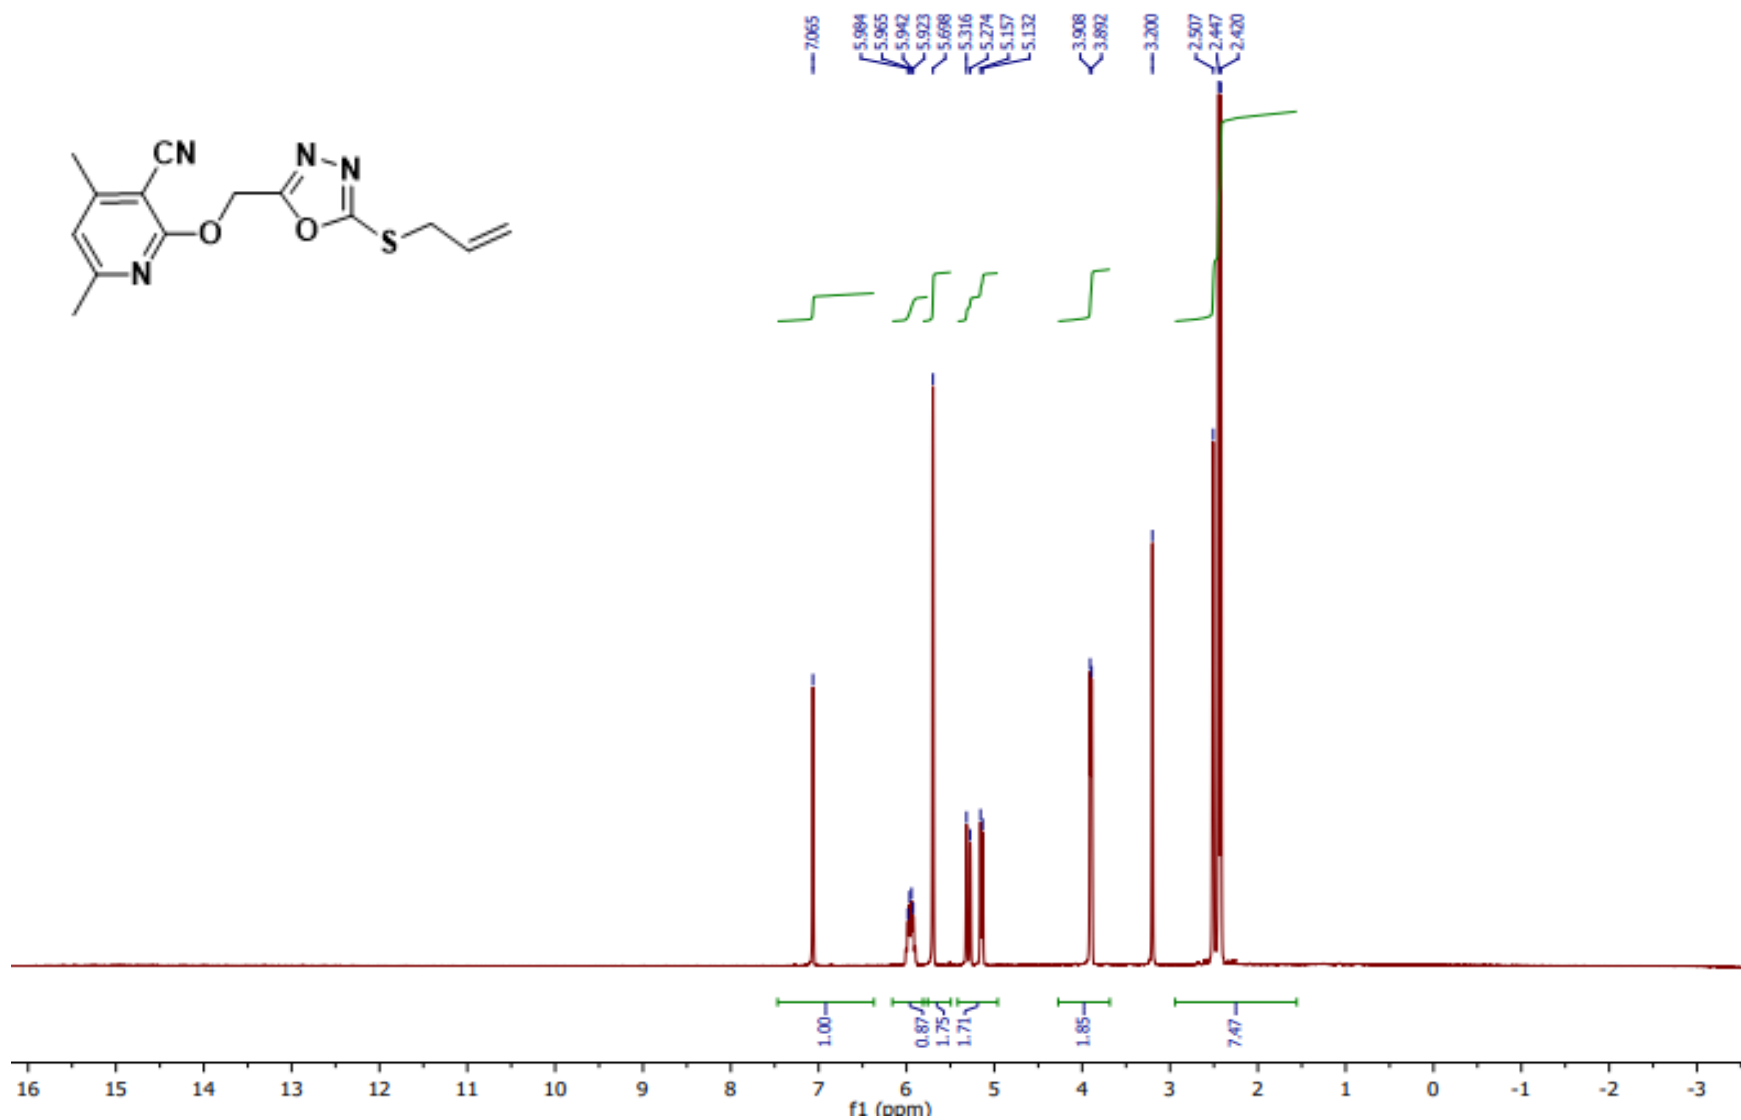

Fig.S8 : <sup>1</sup>H-NMR (DMSO-d<sub>6</sub>)spectrum of compound 5

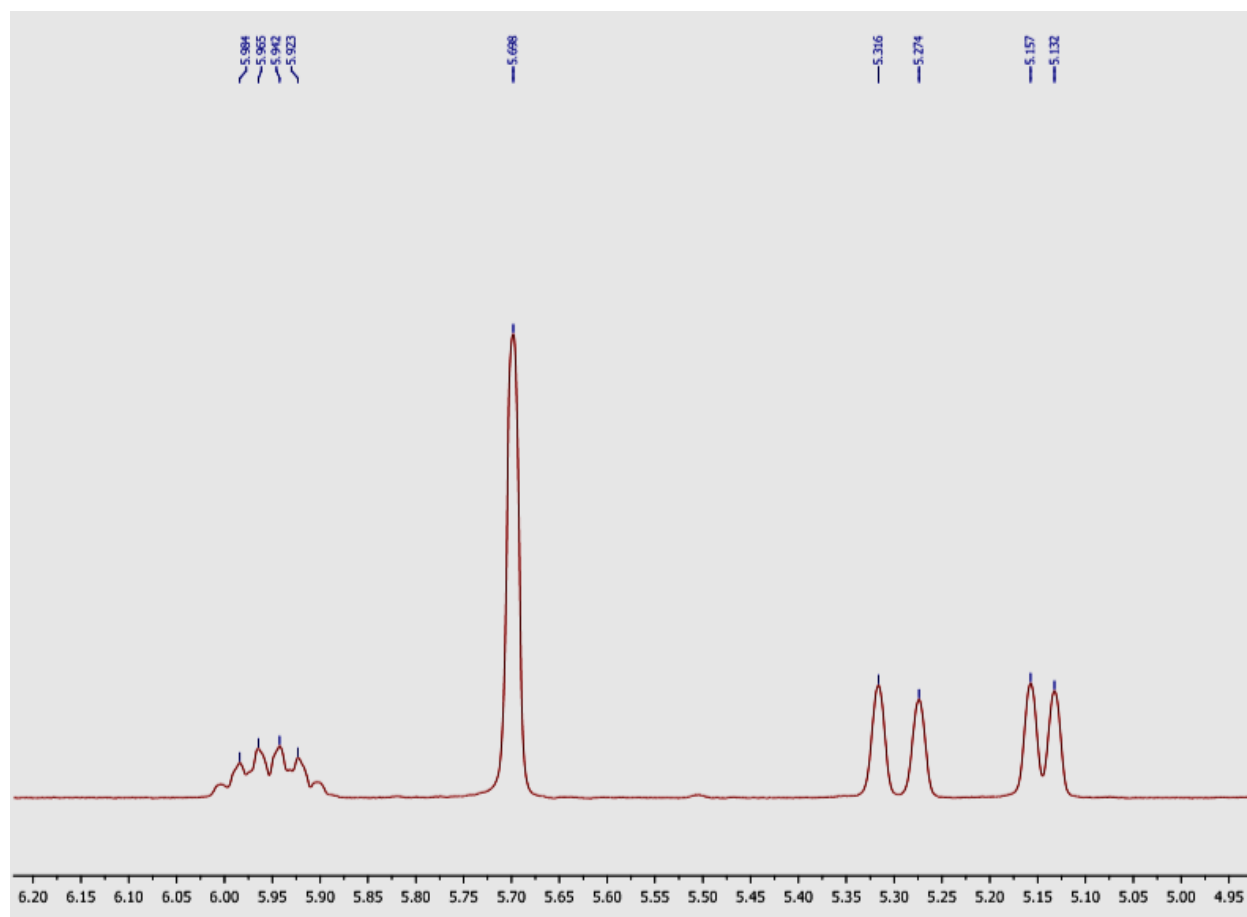

**zoomed image**

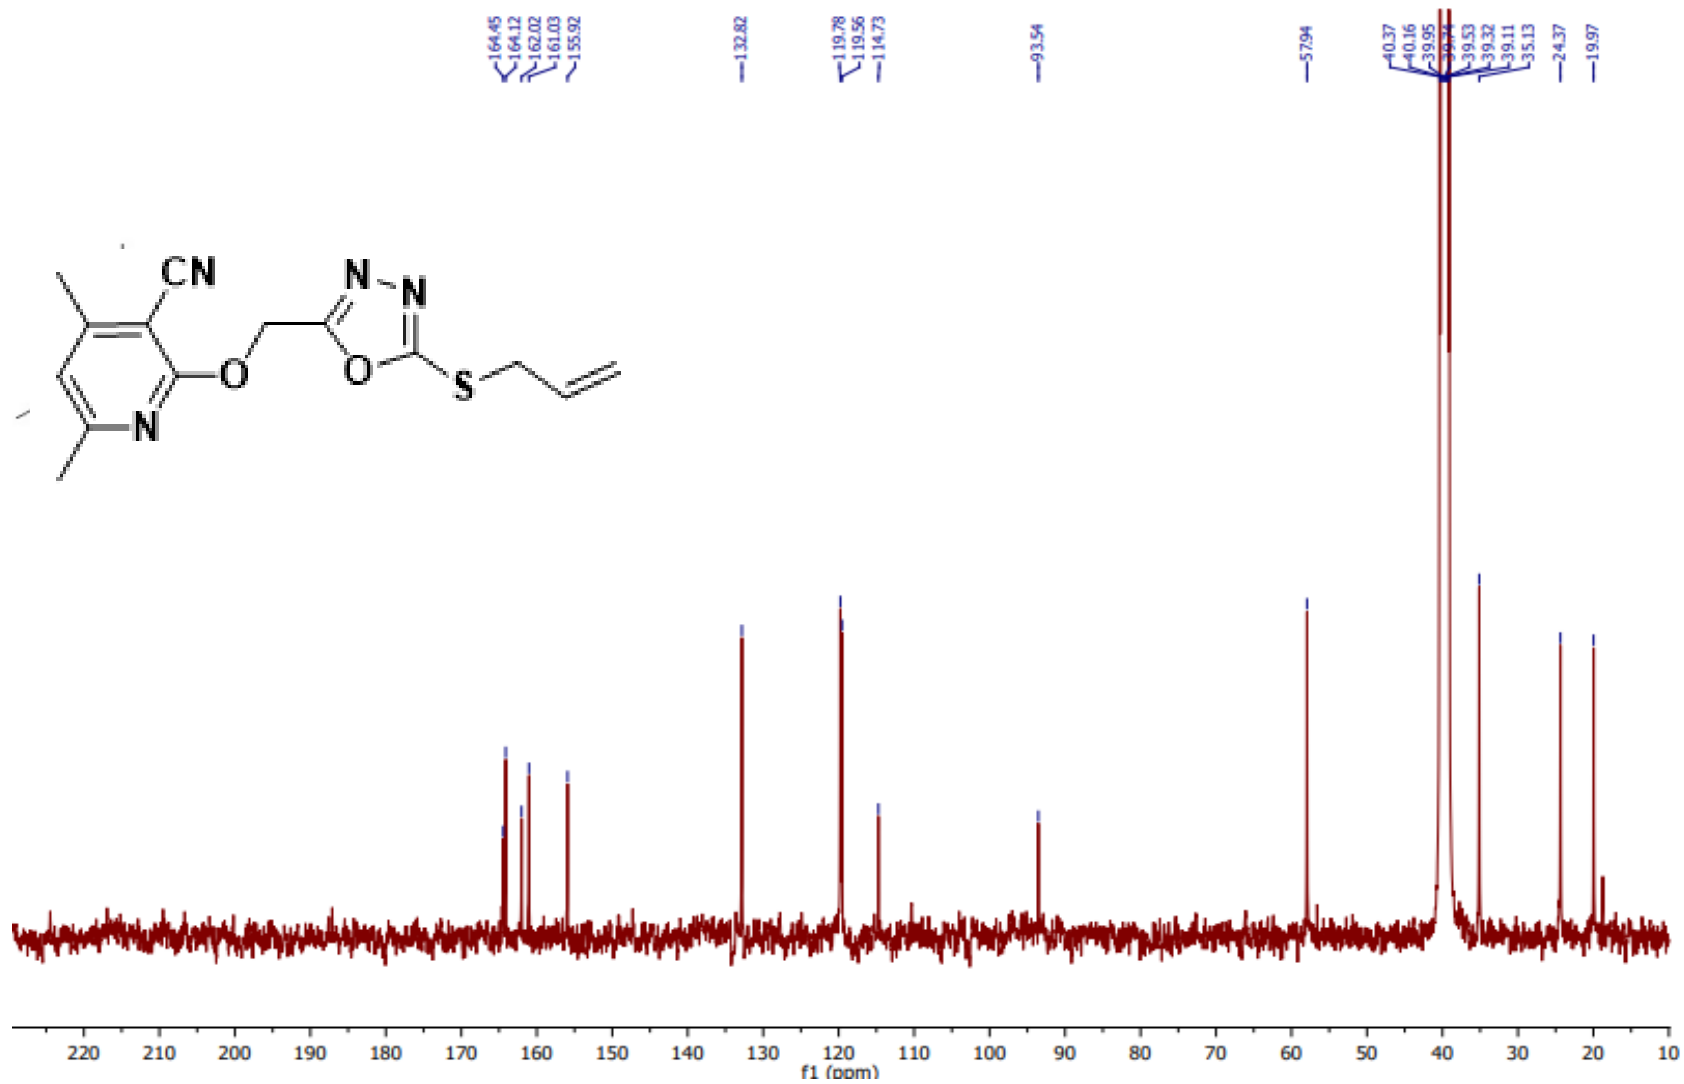

Fig.S9 :  $^{13}\text{C-NMR}$  (DMSO- $d_6$ ) spectrum of compound 5

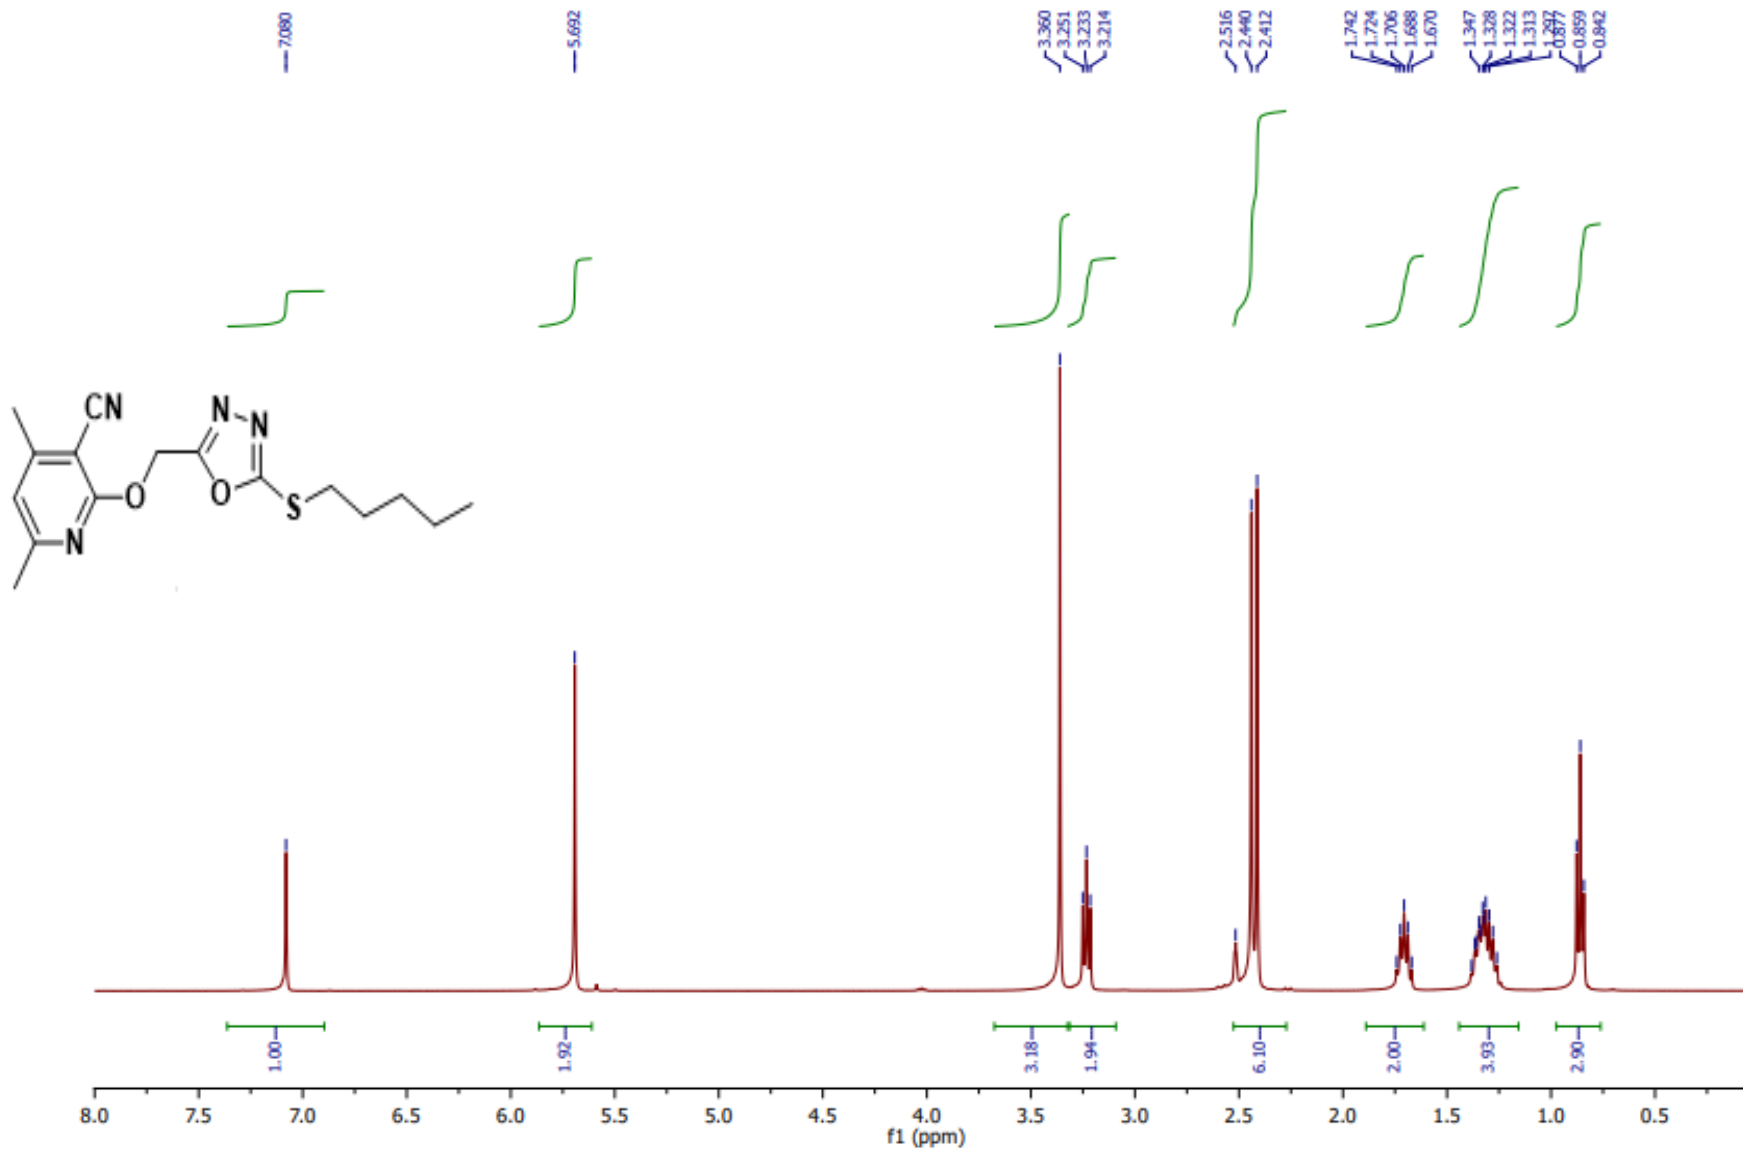

Fig.S10 : <sup>1</sup>H-NMR (DMSO-d<sub>6</sub>)spectrum of compound 6

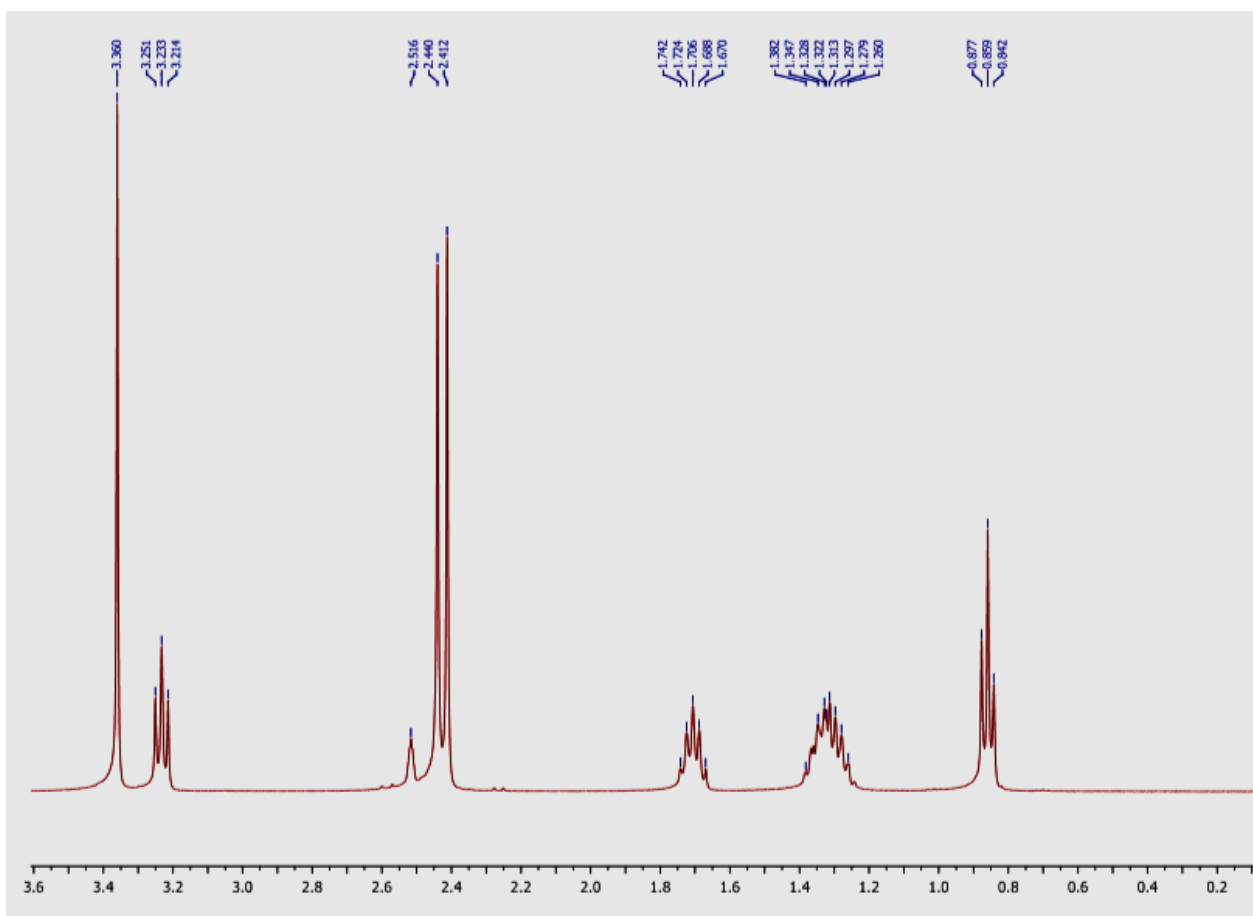

zoomed image

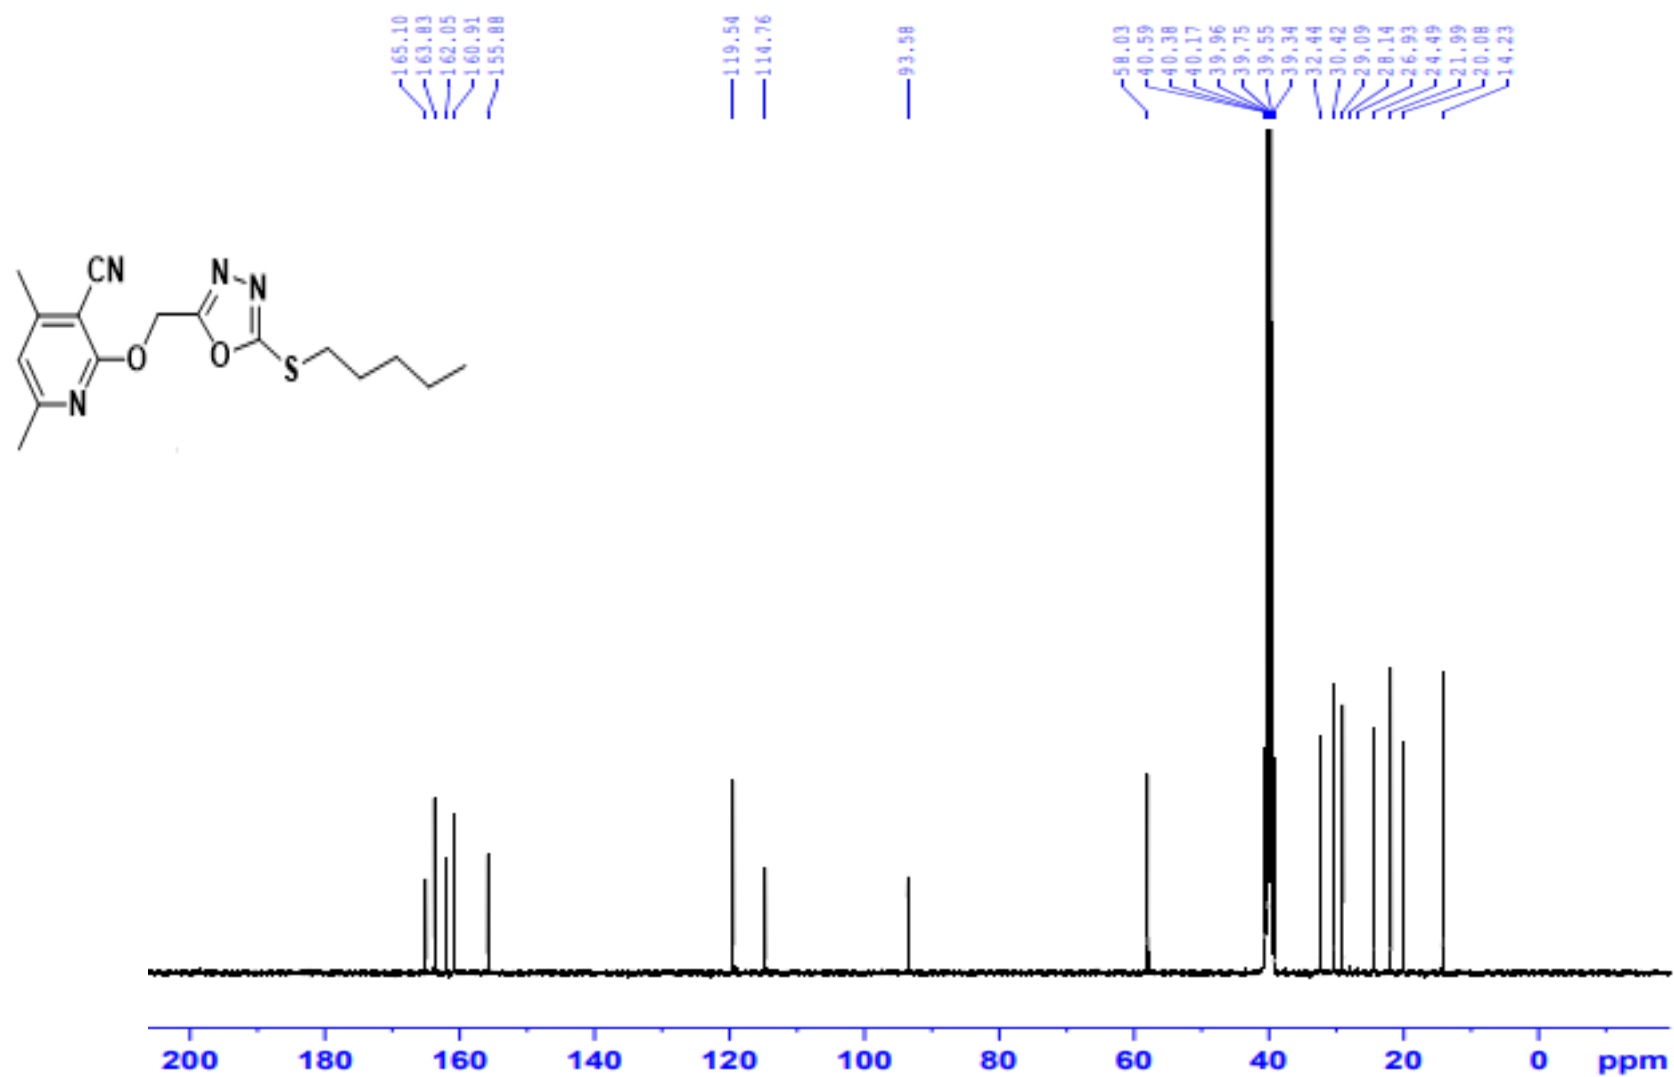

Fig.S11 :  $^{13}\text{C-NMR}$  (DMSO- $d_6$ )spectrum of compound 6



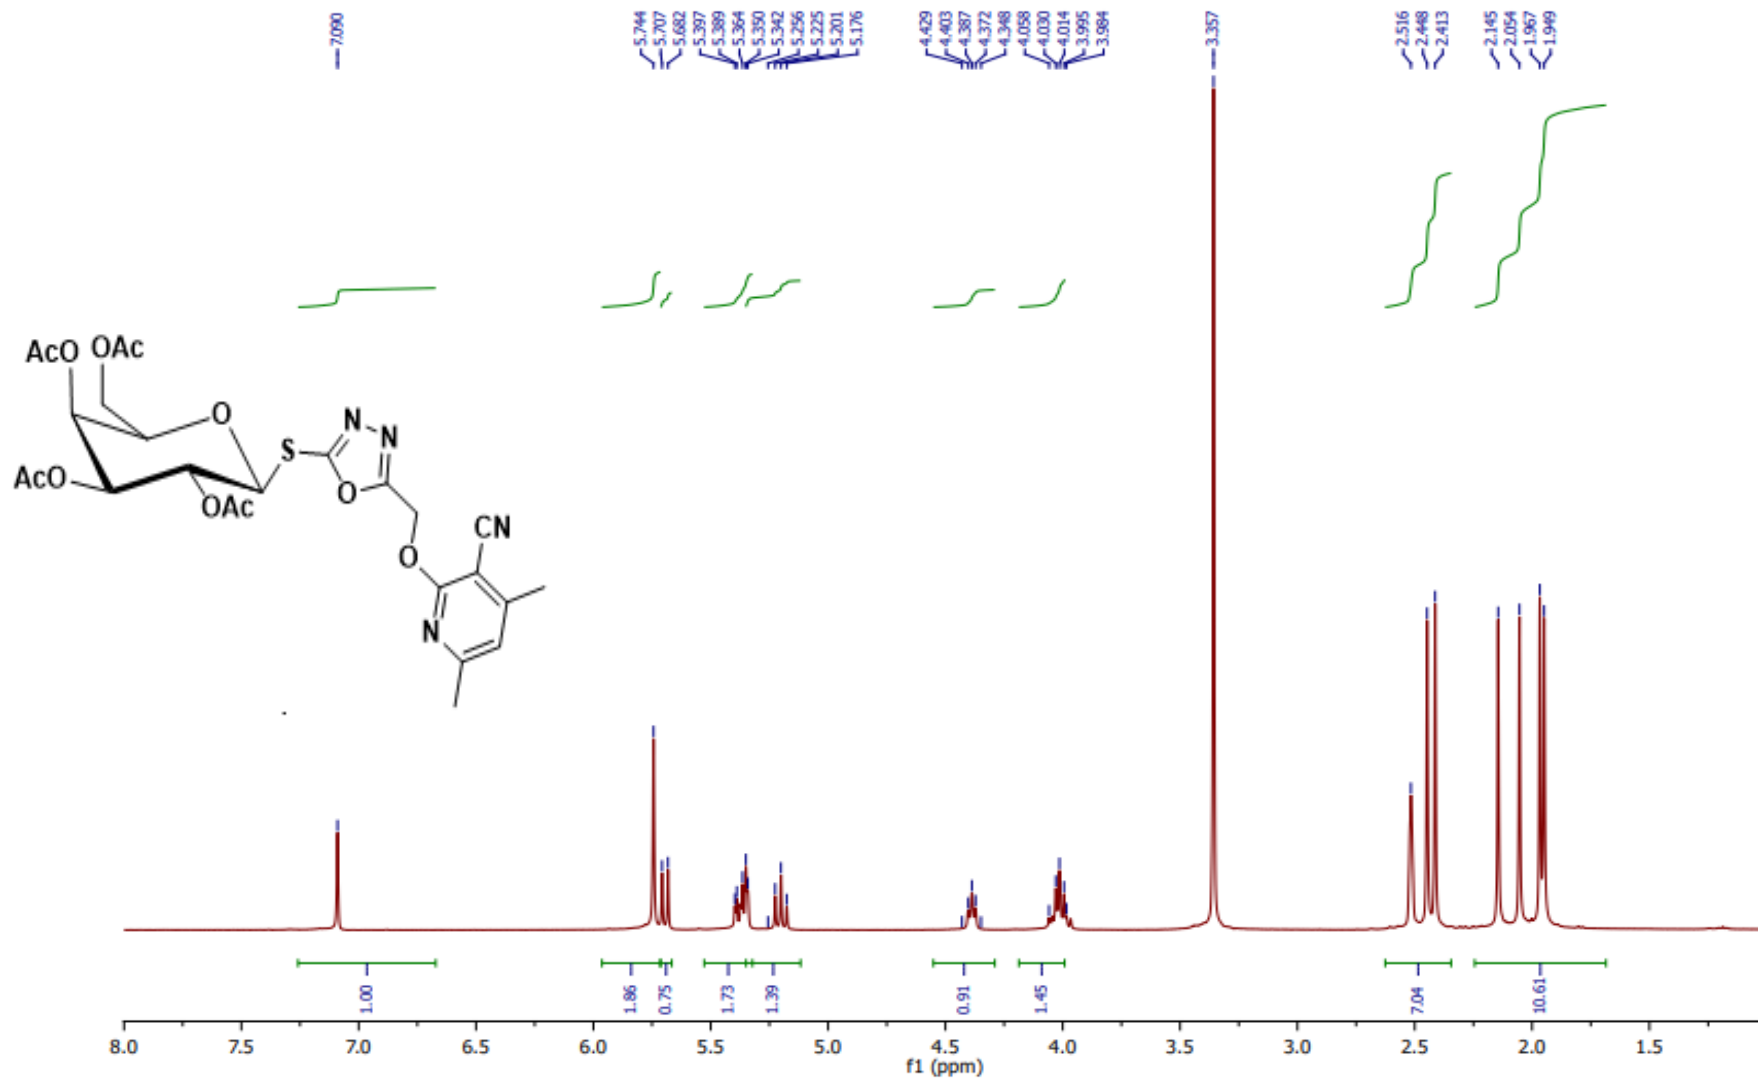

Fig.S12 :  $^1\text{H-NMR}$  (DMSO- $d_6$ )spectrum of compound 8

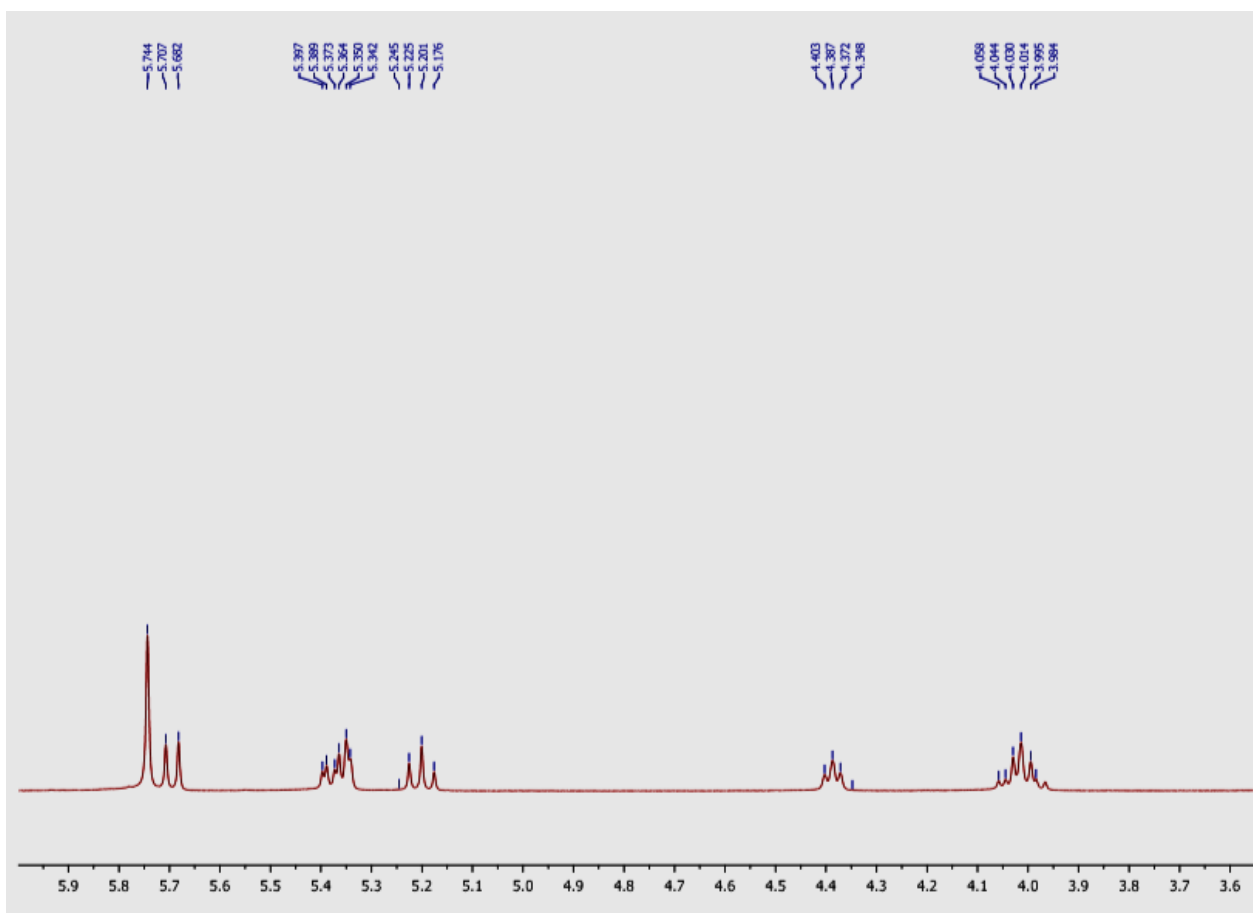

zoomed image

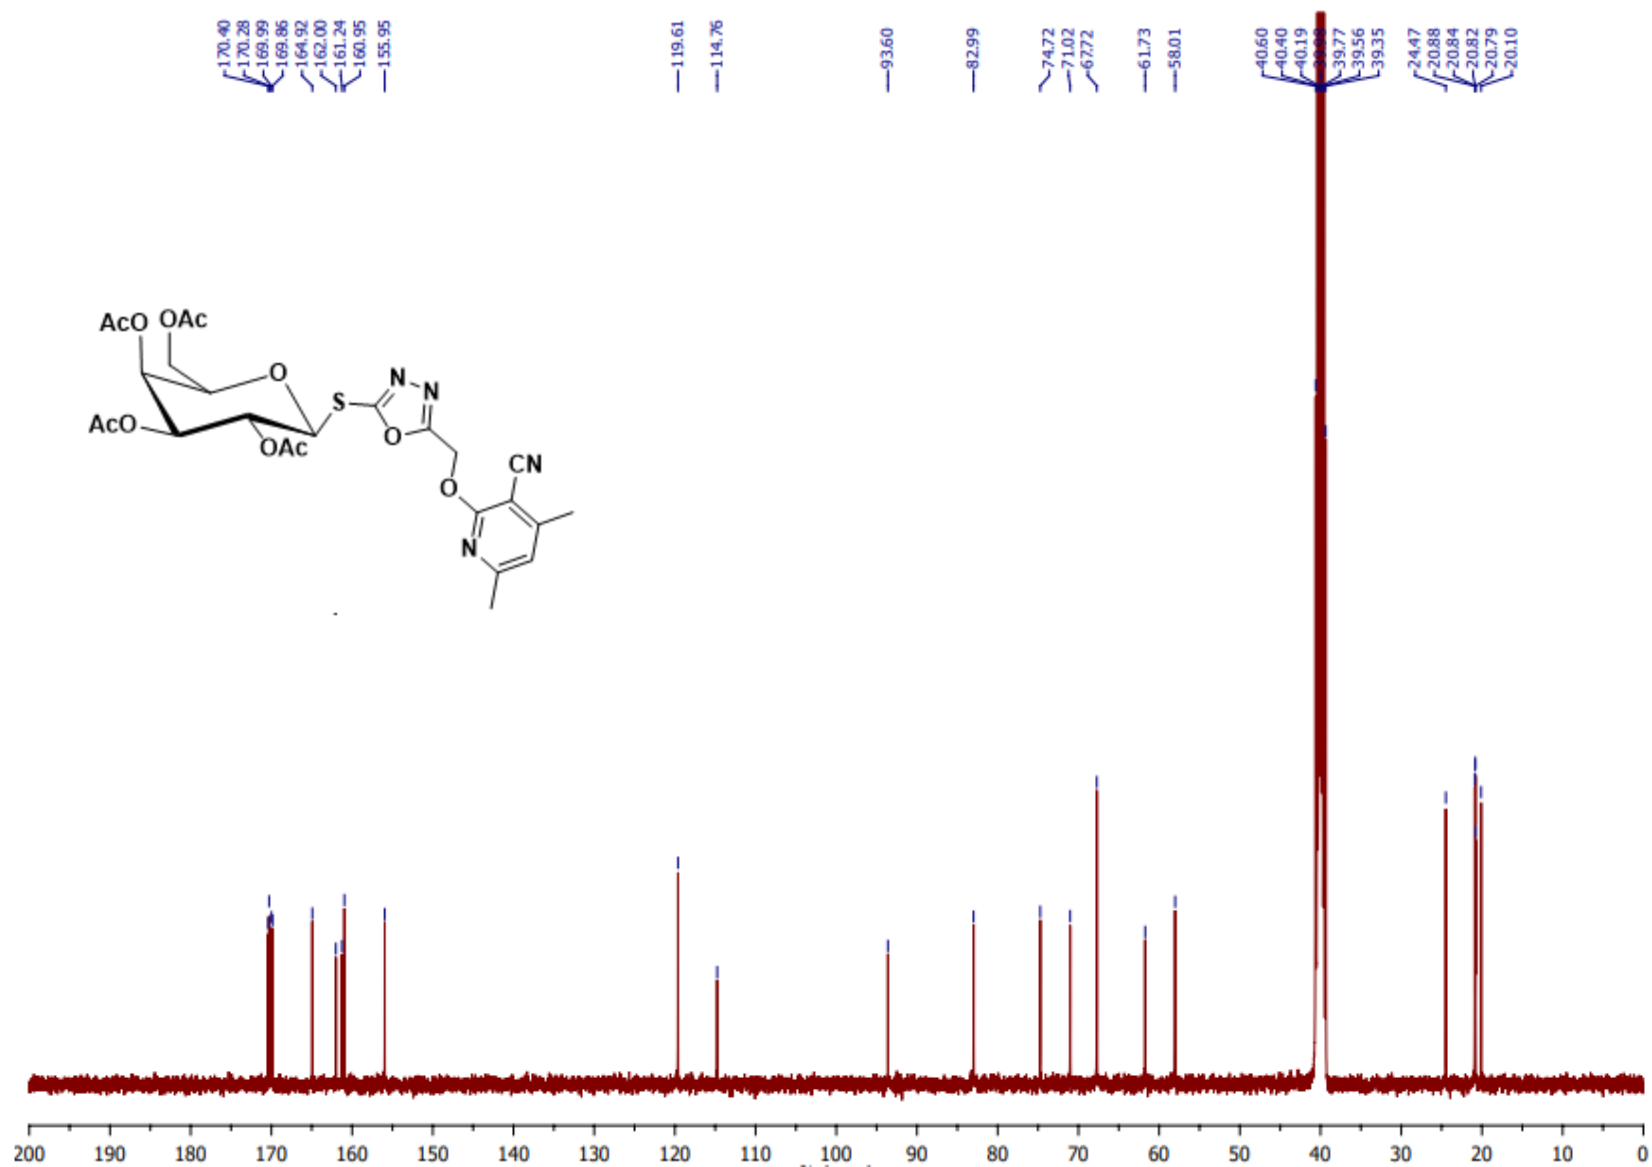

Fig.S13 :  $^{13}\text{C-NMR}$  (DMSO- $d_6$ )spectrum of compound 8

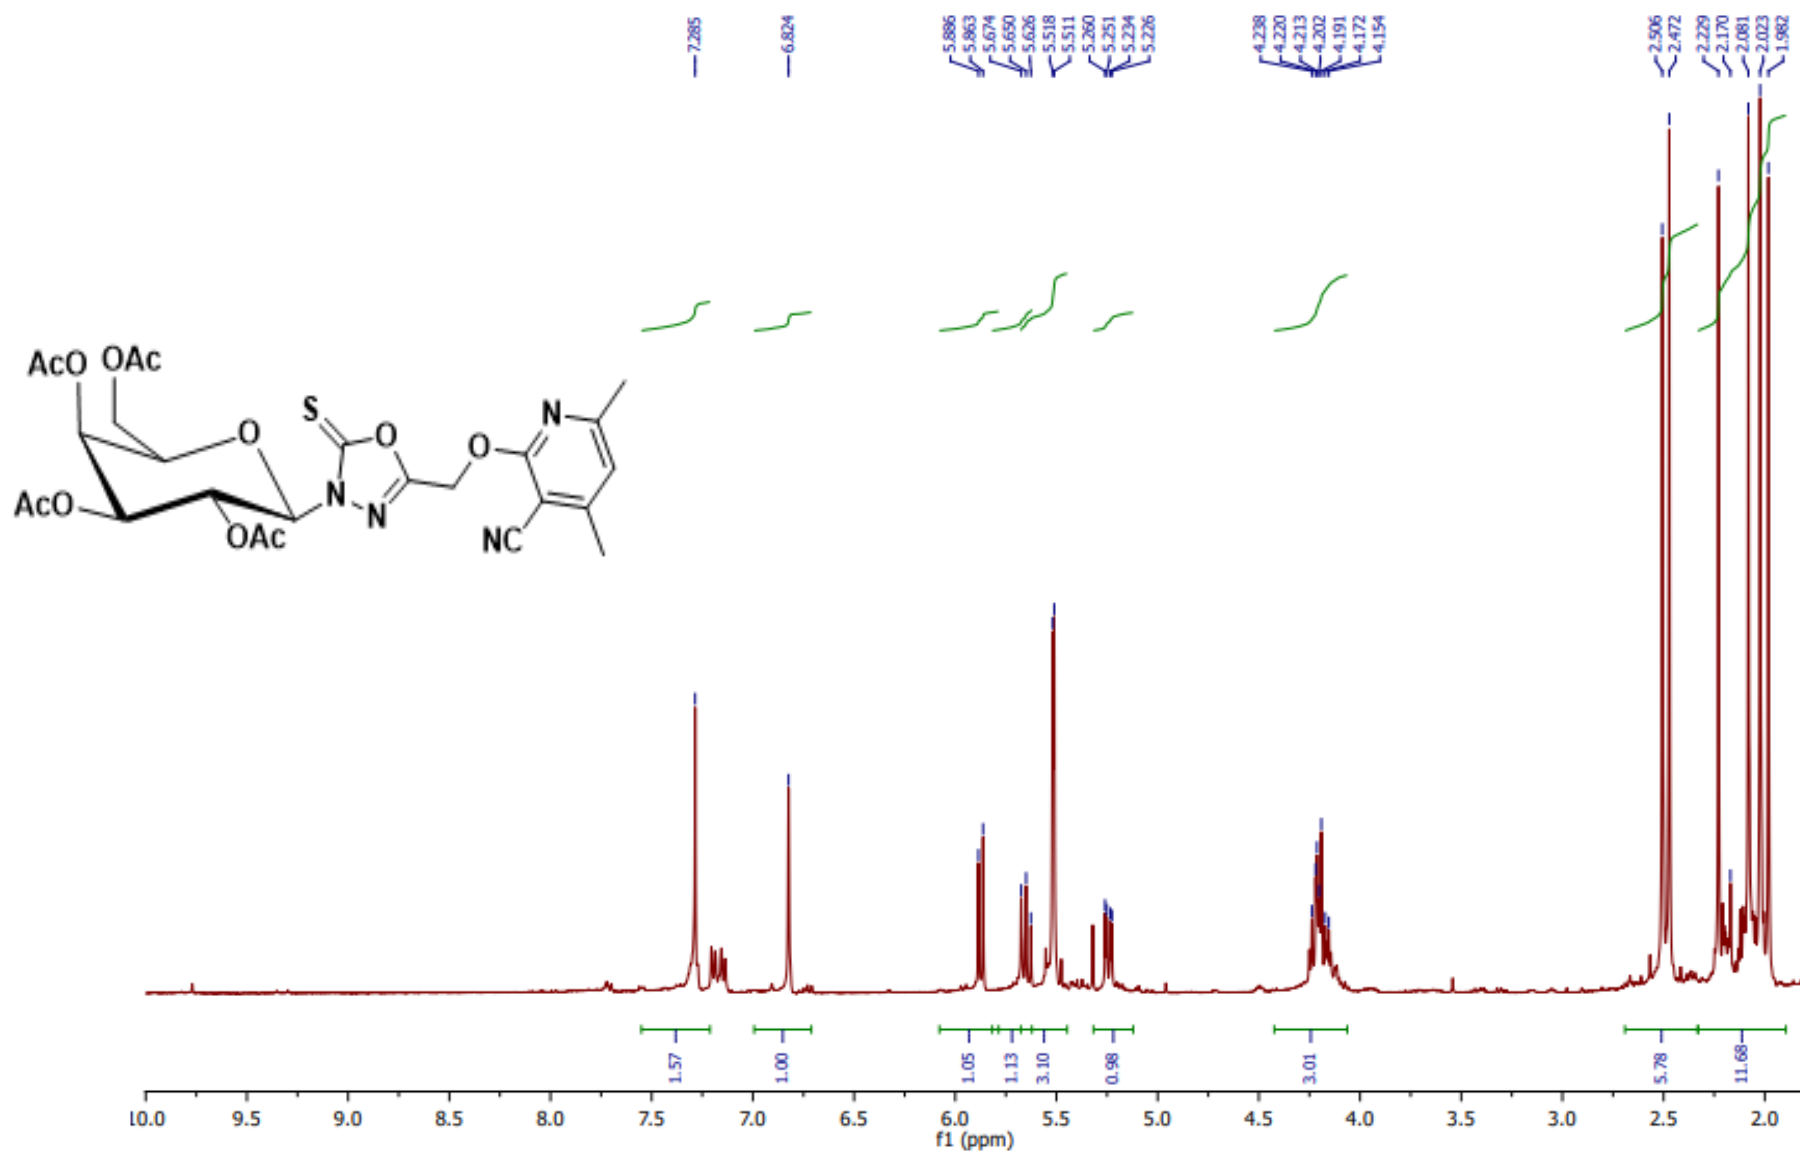

Fig. S14:  $^1\text{H-NMR}$  (CDCl<sub>3</sub>-d<sub>6</sub>) spectrum of compound 9

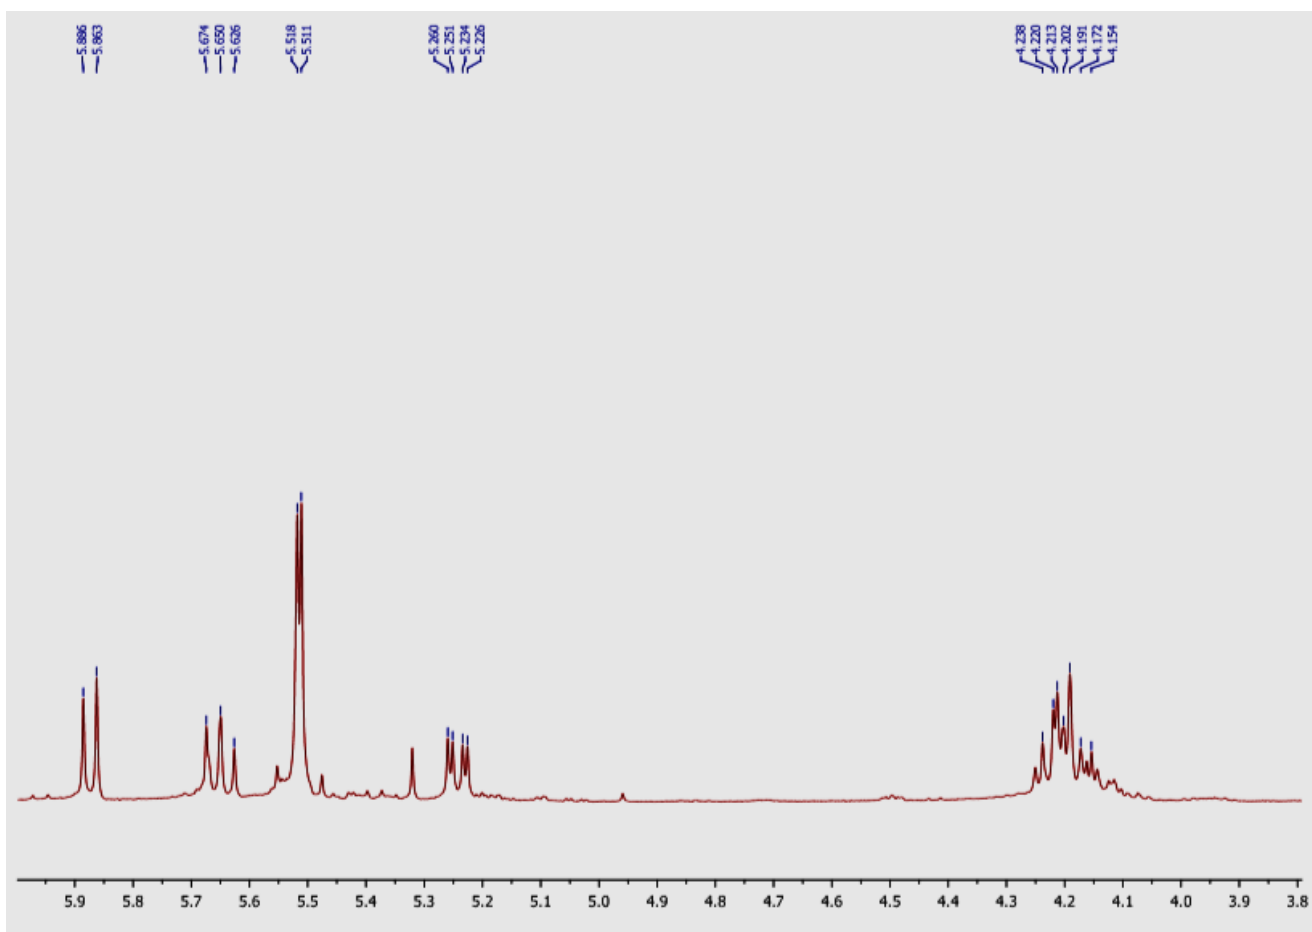

zoomed image

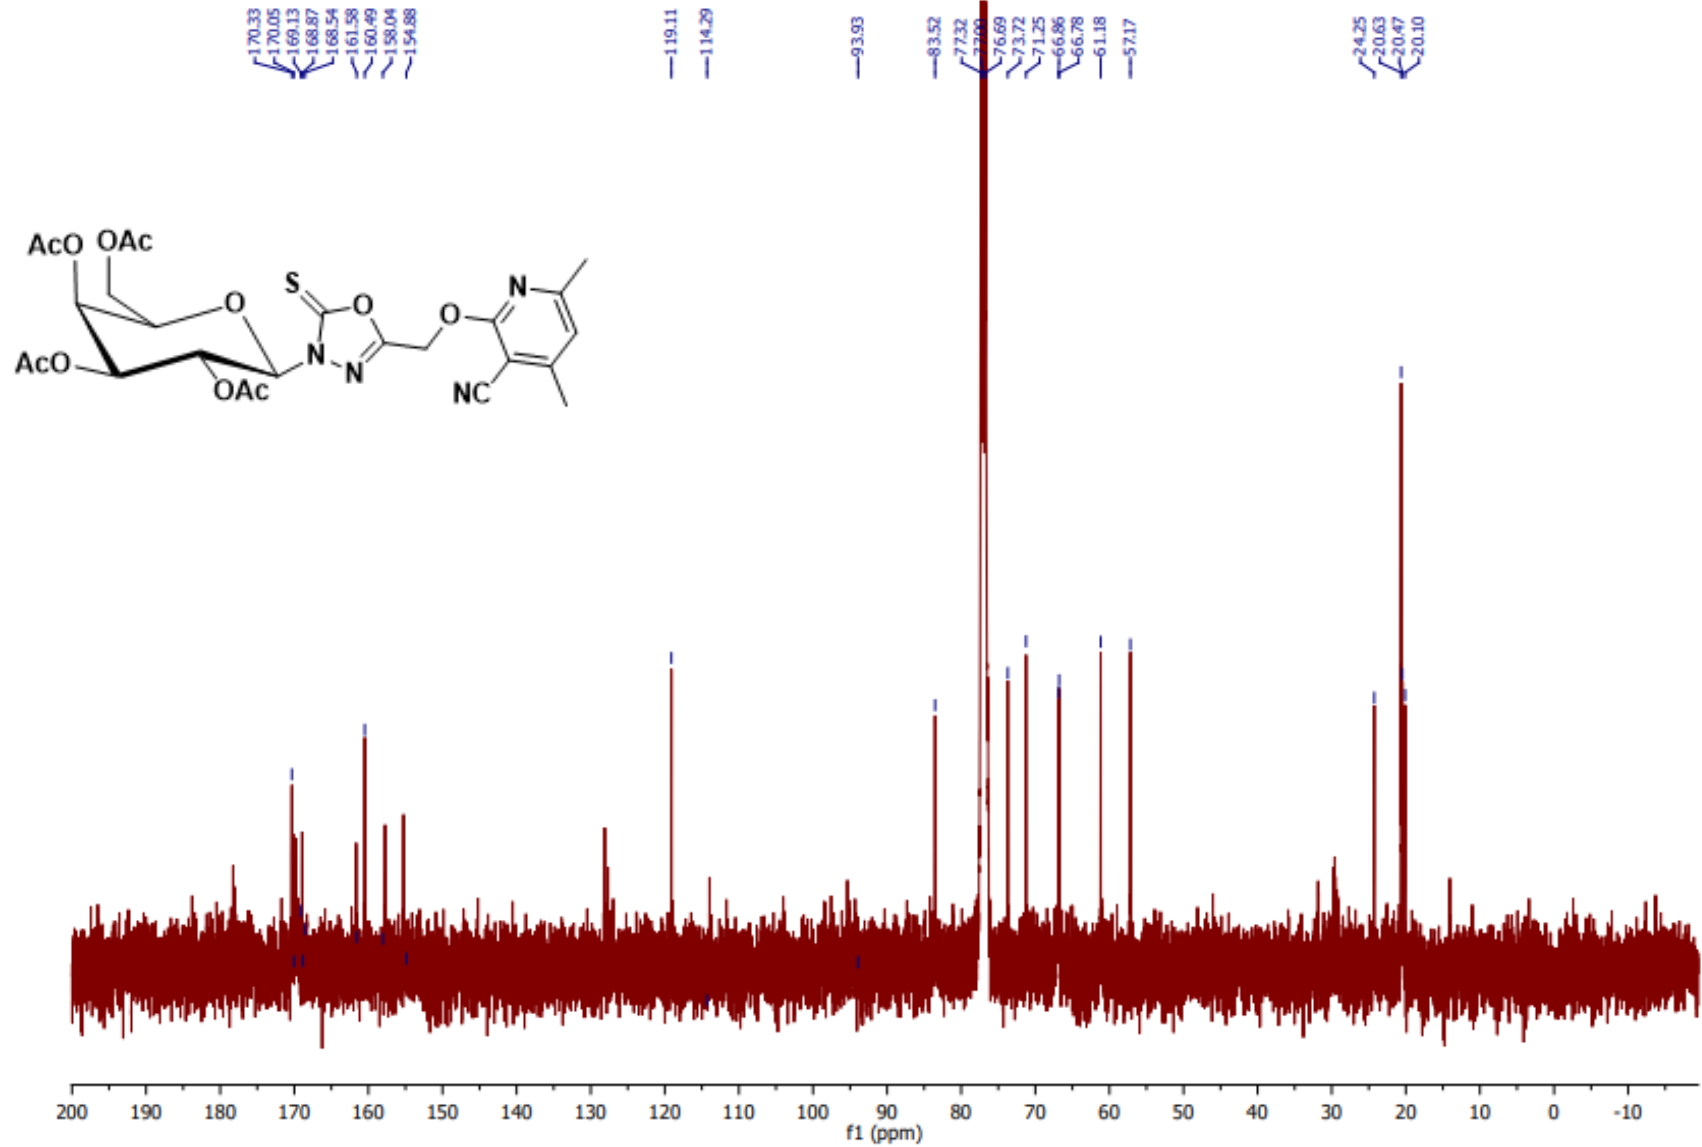

Fig.S15 : <sup>13</sup>C-NMR (CDCl<sub>3</sub>-d<sub>6</sub>)spectrum of compound 9

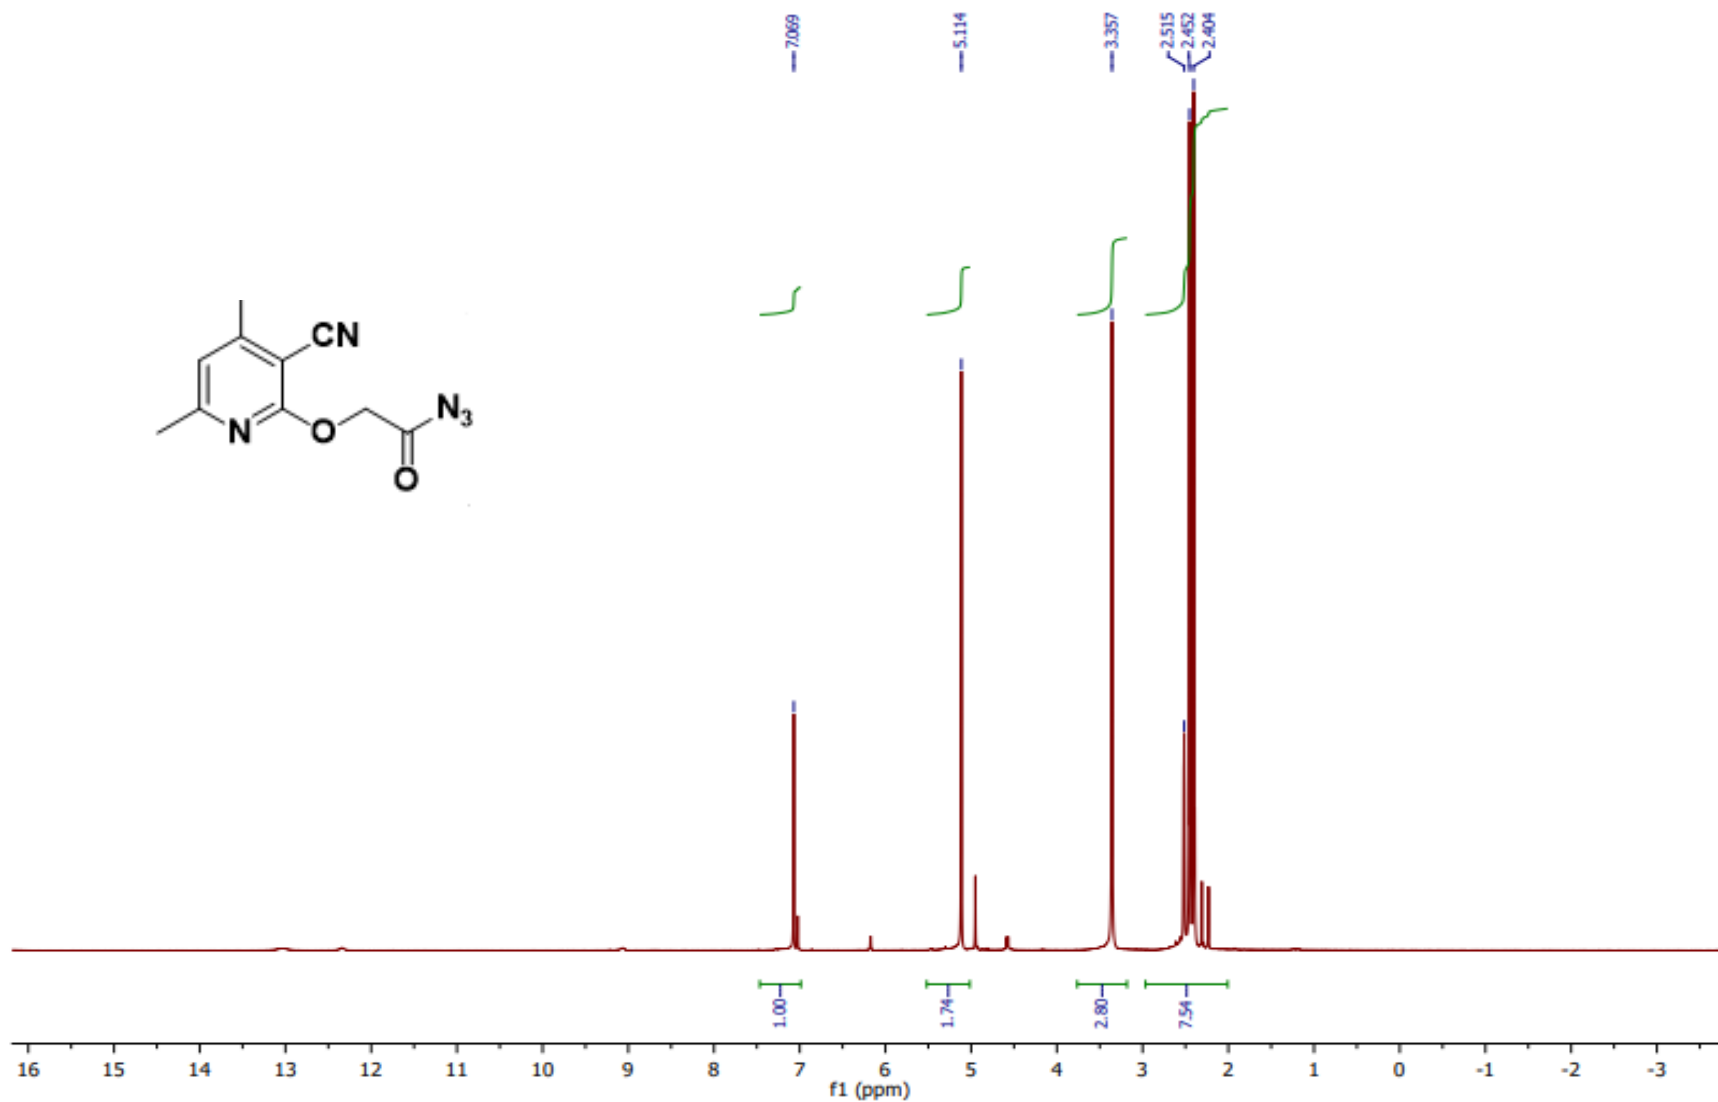

Fig.S16 : <sup>1</sup>H-NMR (DMSO-d<sub>6</sub>) spectrum of compound 10

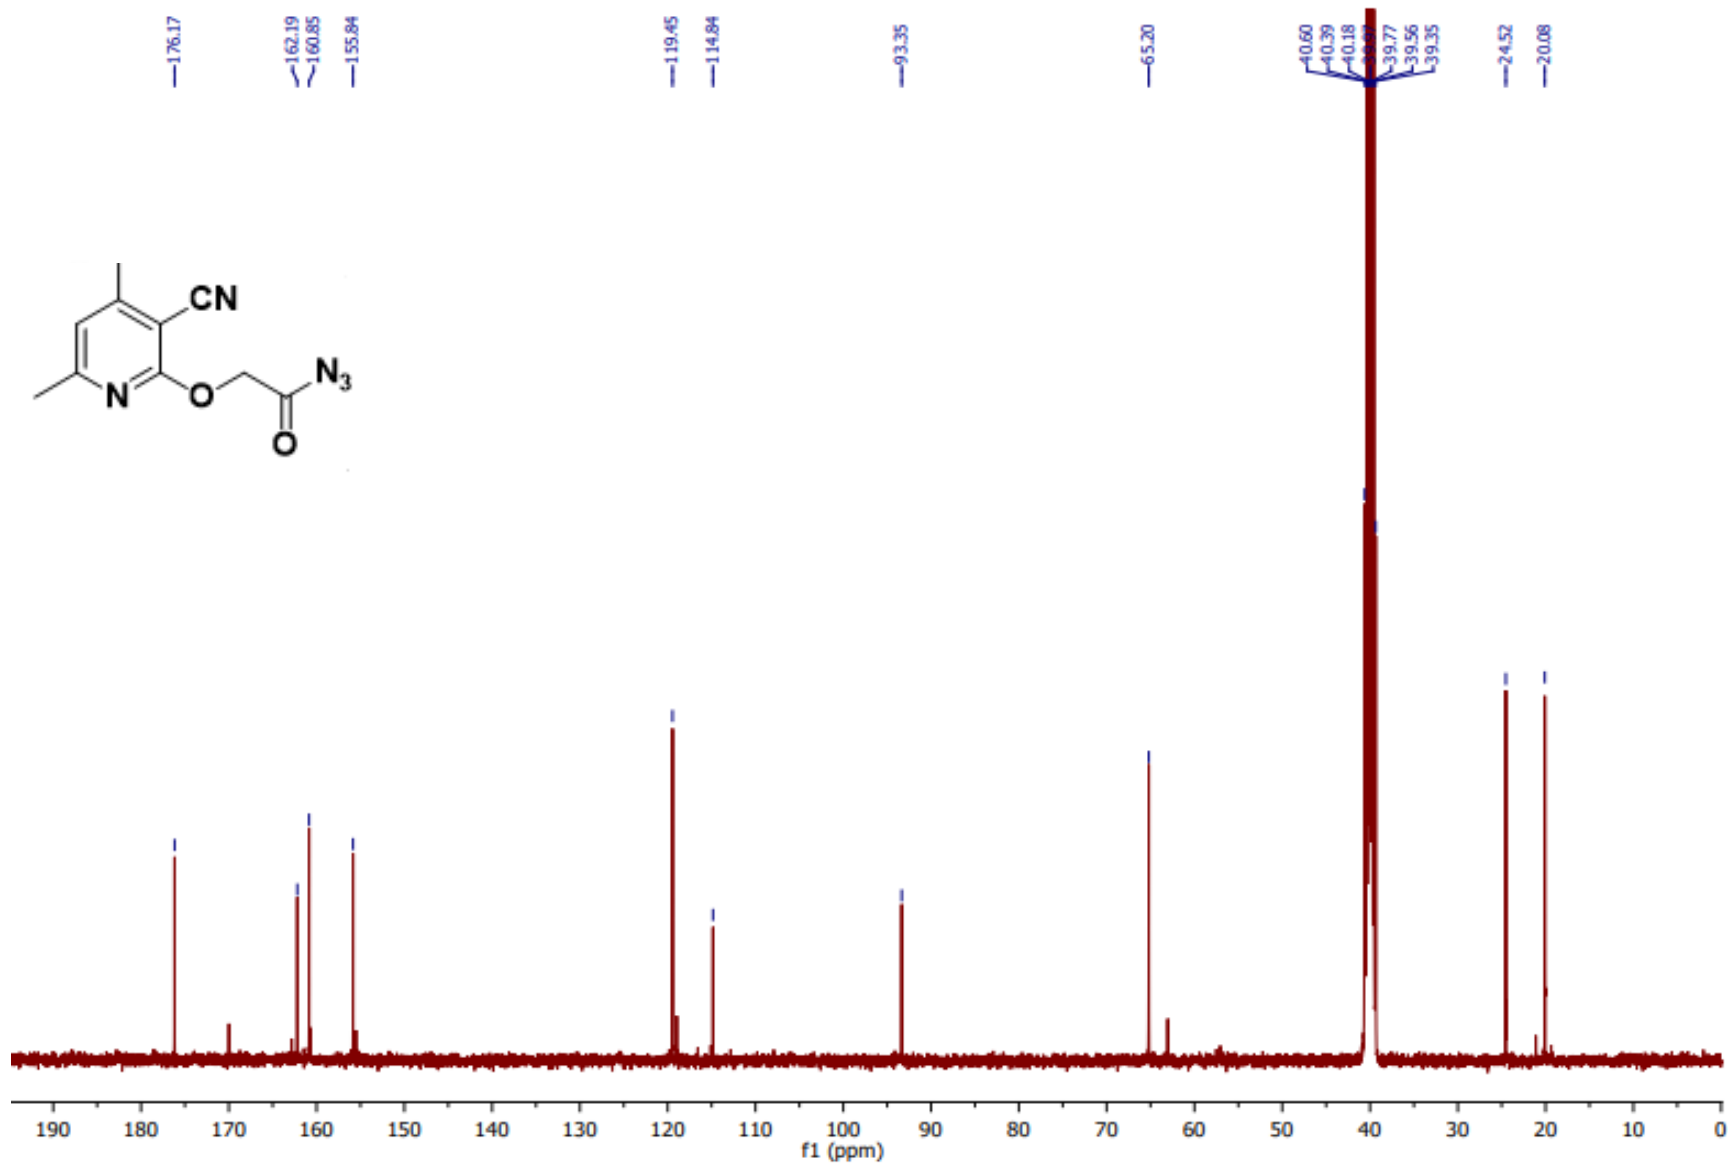

Fig. S17: <sup>13</sup>C-NMR (DMSO-d<sub>6</sub>) spectrum of compound 10



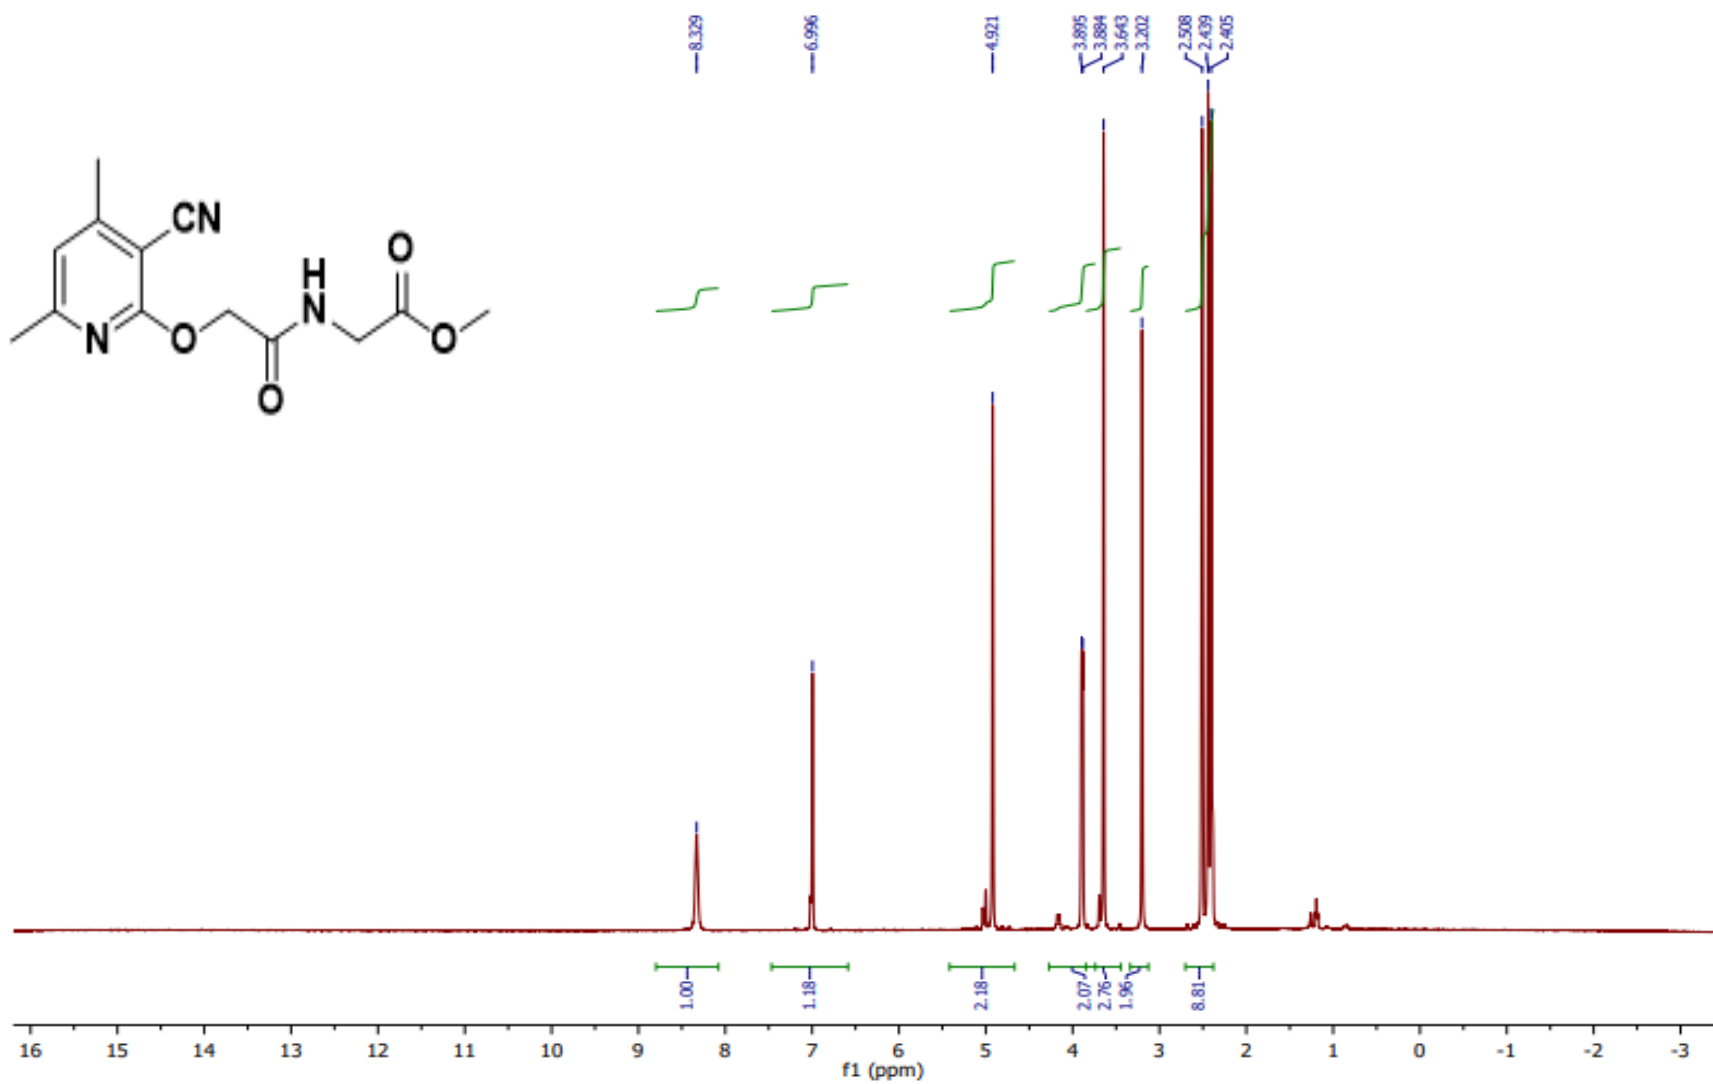

Fig.S18 : <sup>1</sup>H-NMR (DMSO-d<sub>6</sub>)spectrum of compound 11

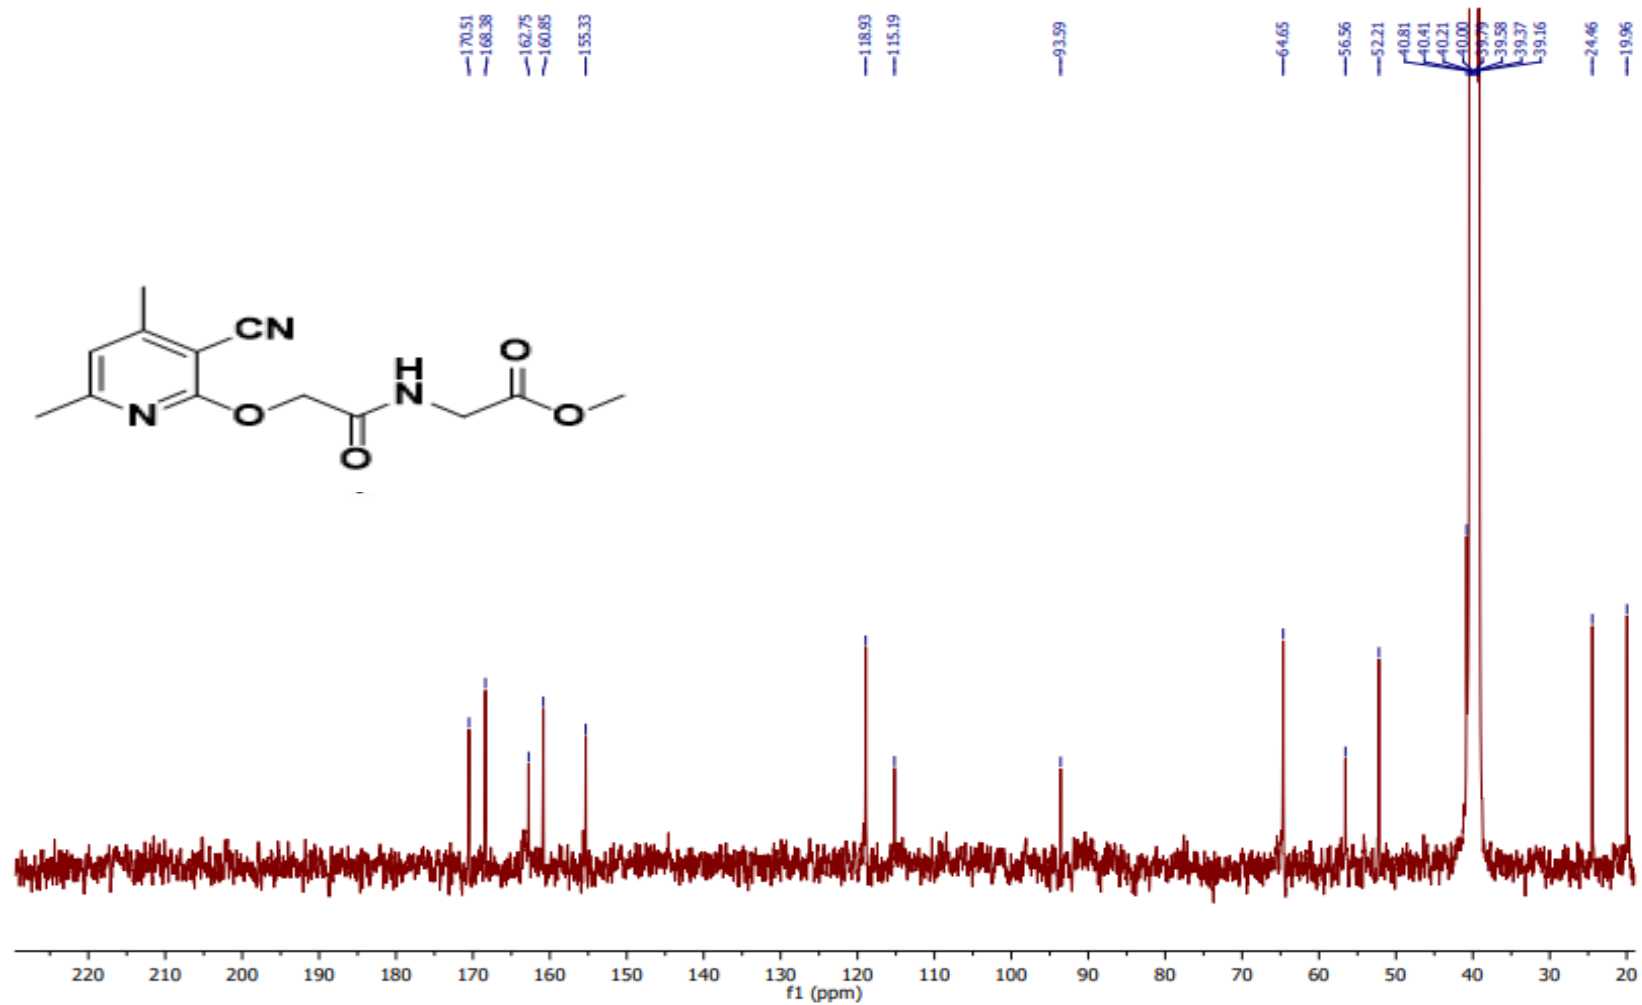

Fig.S19 :  $^{13}\text{C}$ -NMR (DMSO- $d_6$ ) spectrum of compound 11

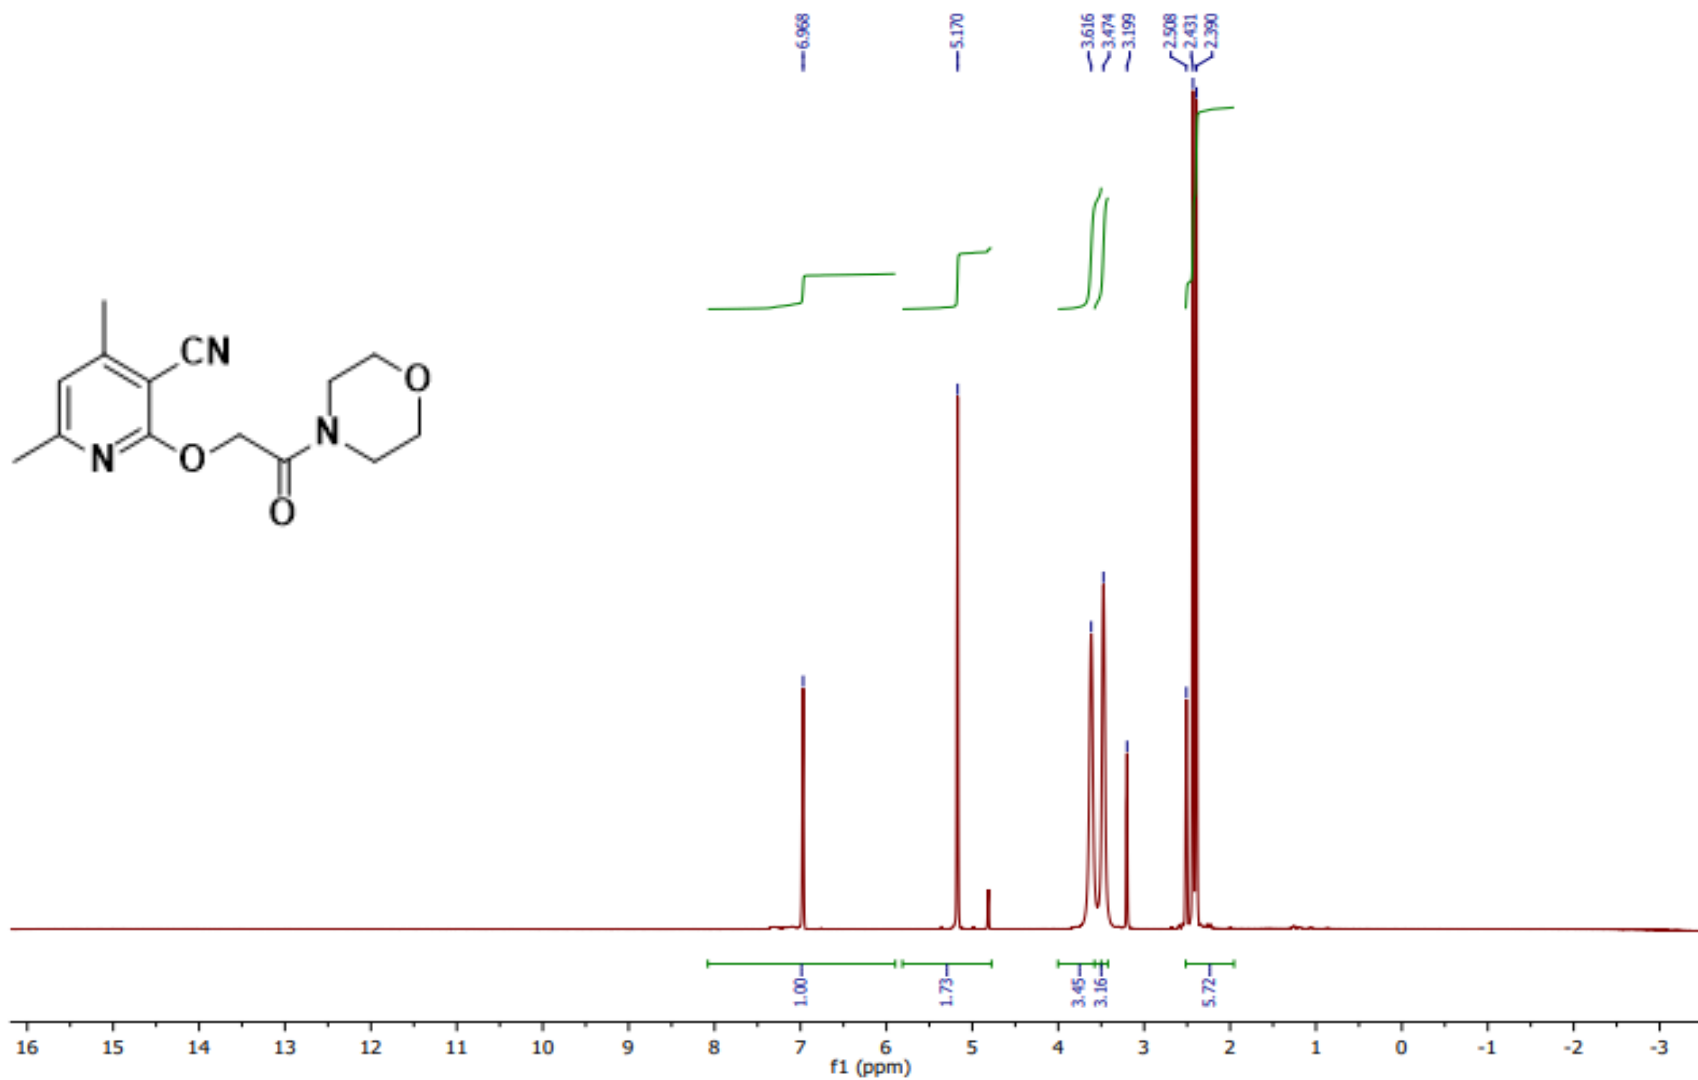

Fig.S20 : <sup>1</sup>H-NMR (DMSO-d<sub>6</sub>)spectrum of compound 12

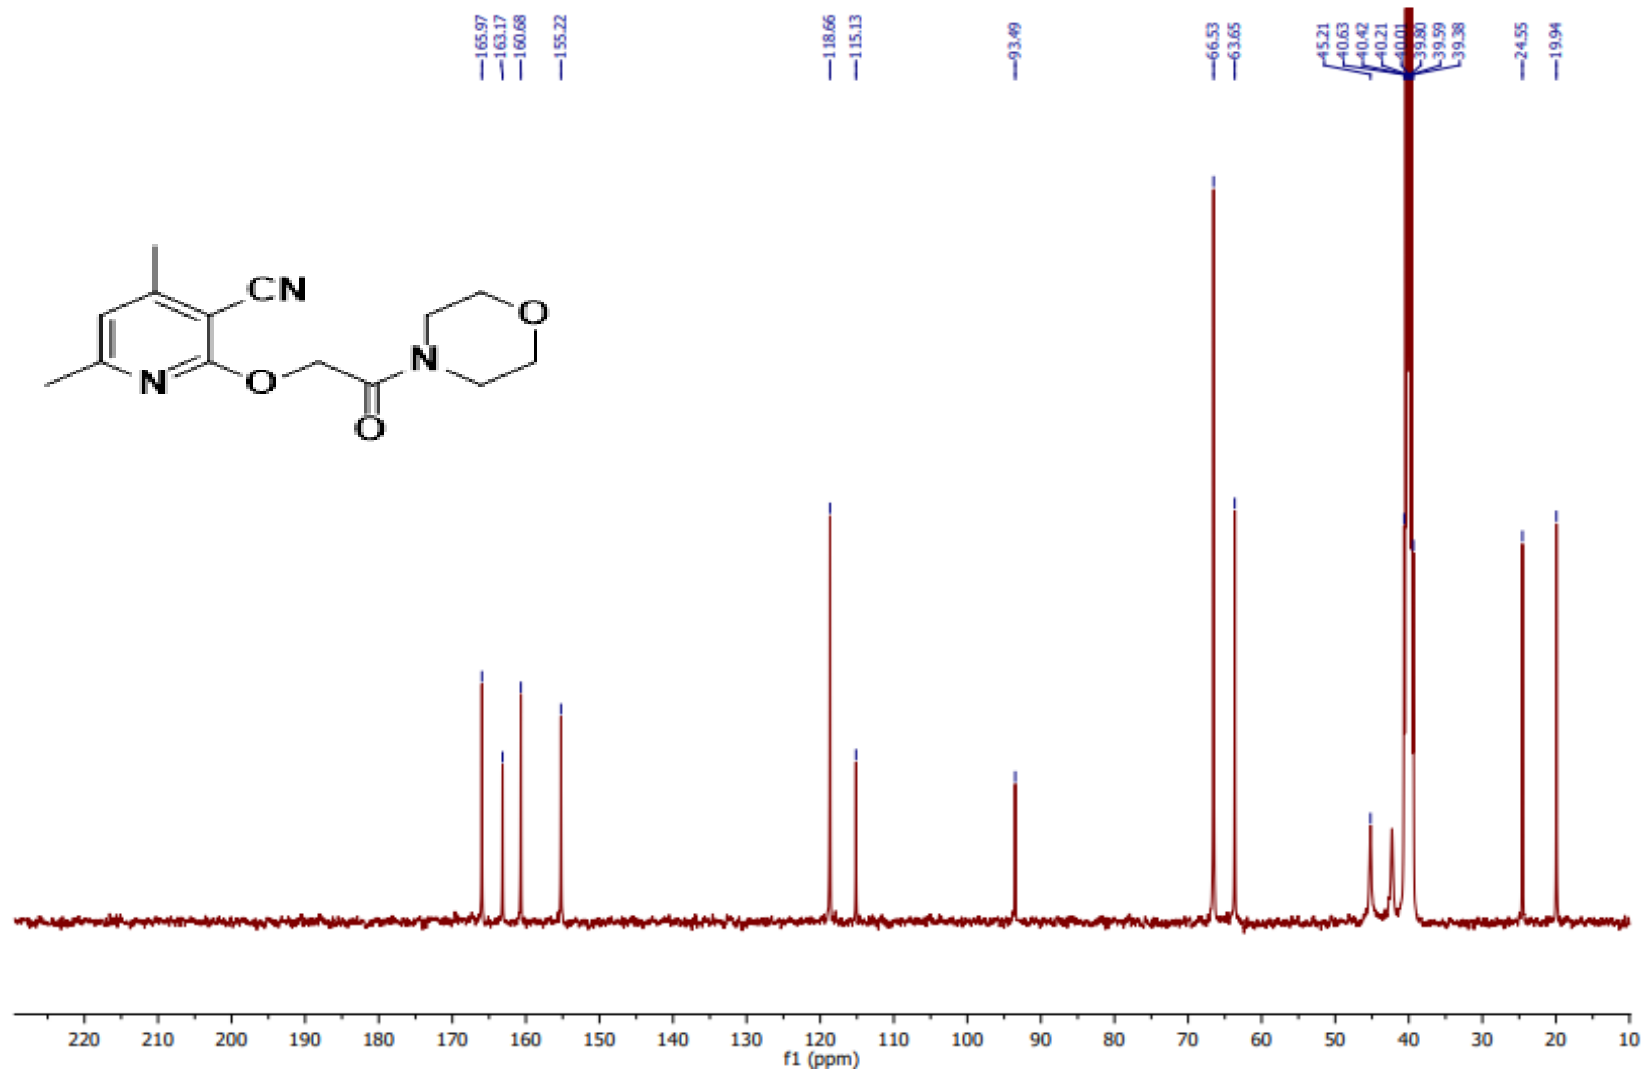

Fig.S21 :  $^{13}\text{C}$ -NMR ( $\text{DMSO-d}_6$ ) spectrum of compound 12

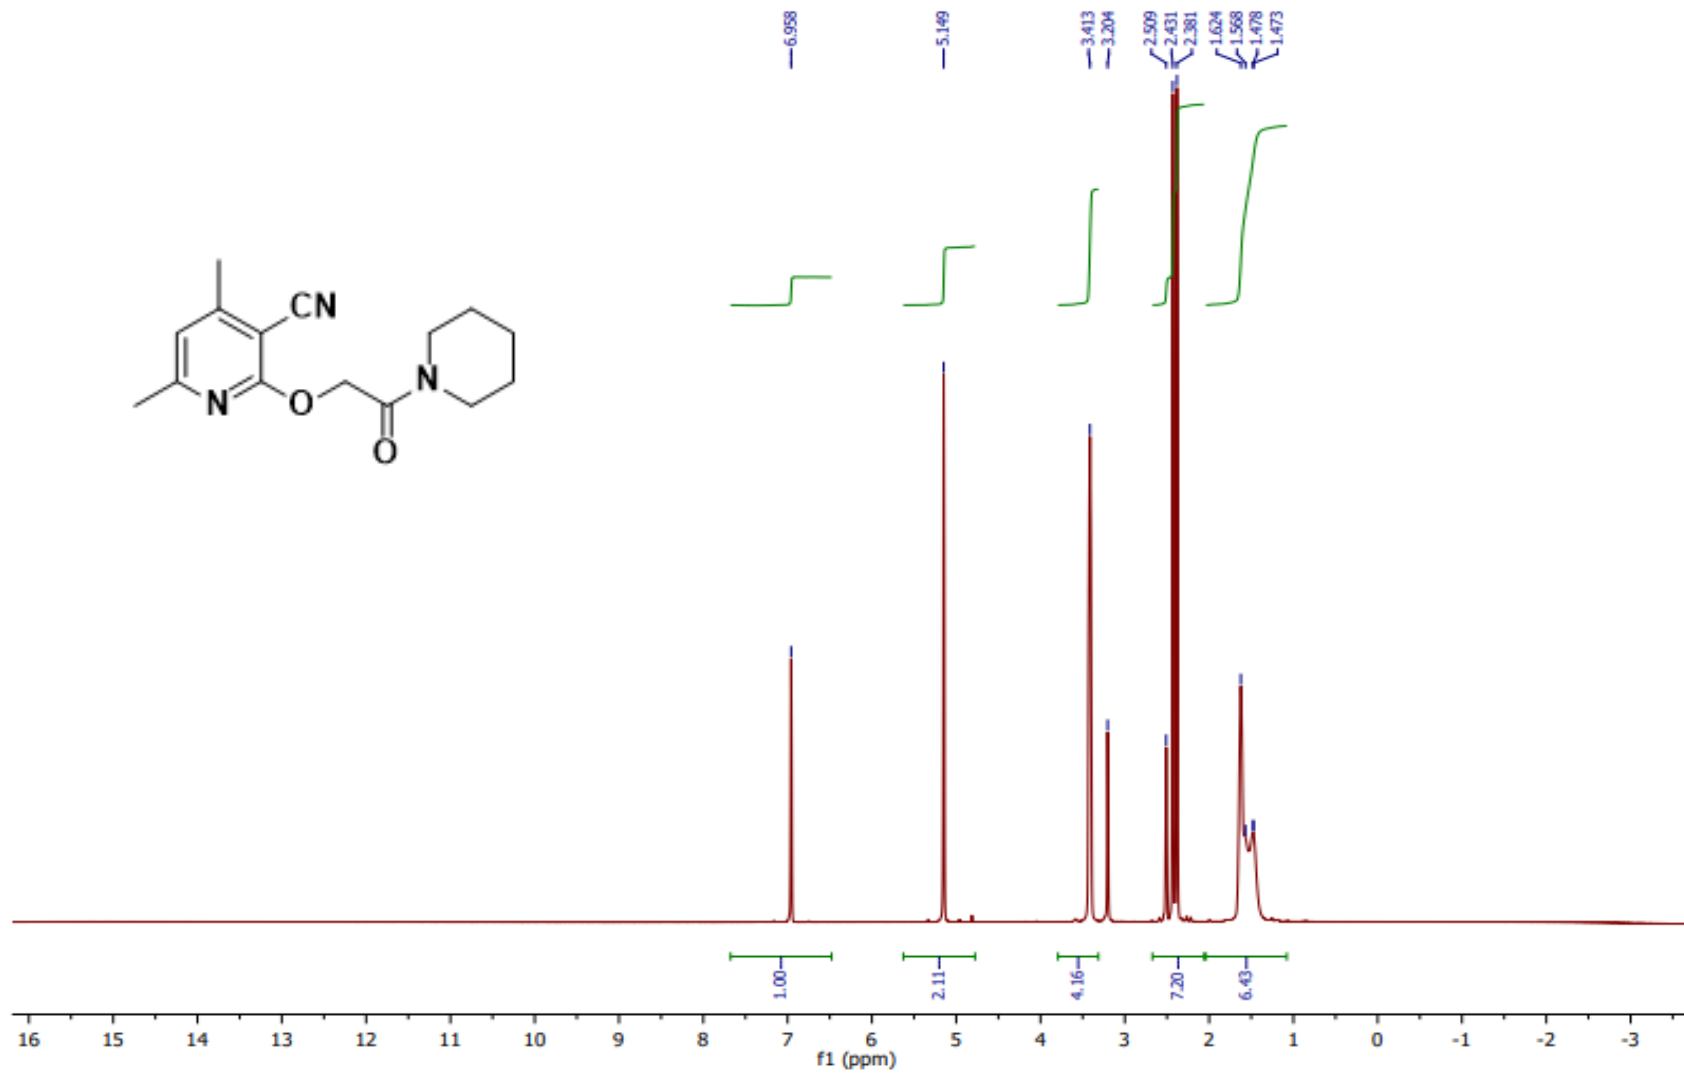

Fig. S22:  $^1\text{H-NMR}$  ( $\text{DMSO-d}_6$ ) spectrum of compound 13

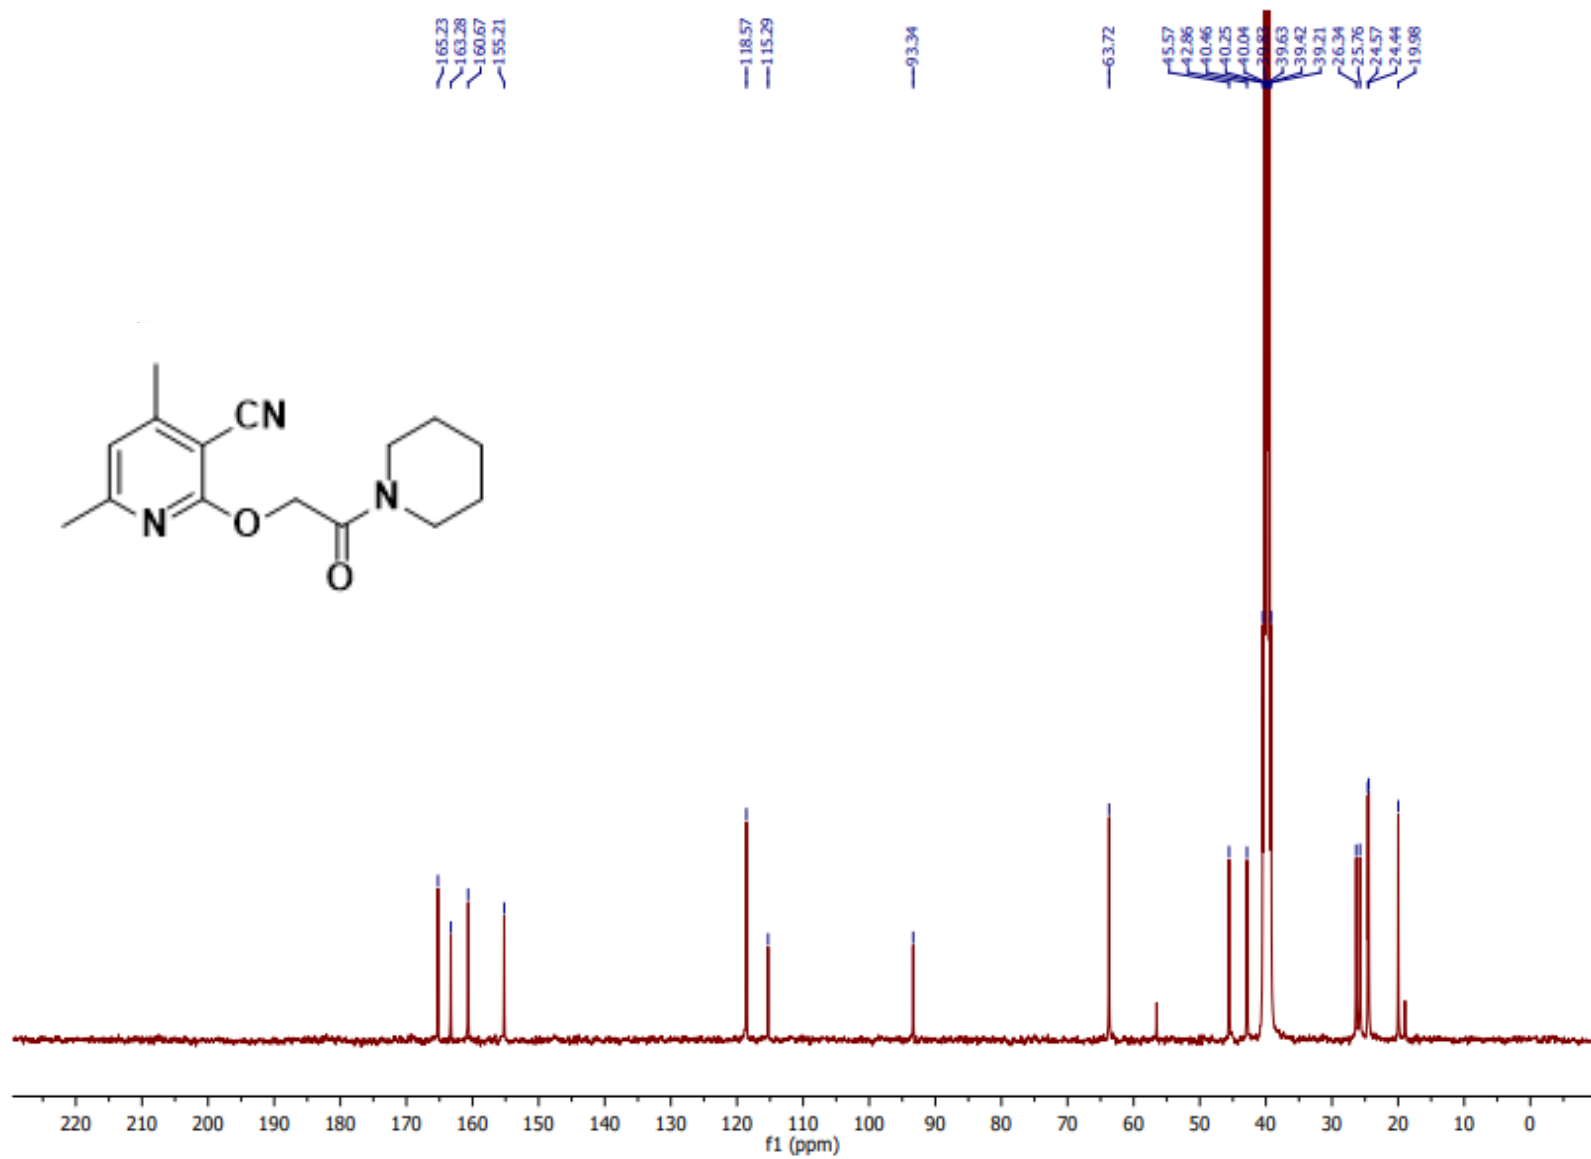

Fig.S23 :  $^{13}\text{C-NMR}$  (DMSO- $d_6$ ) spectrum of compound 13

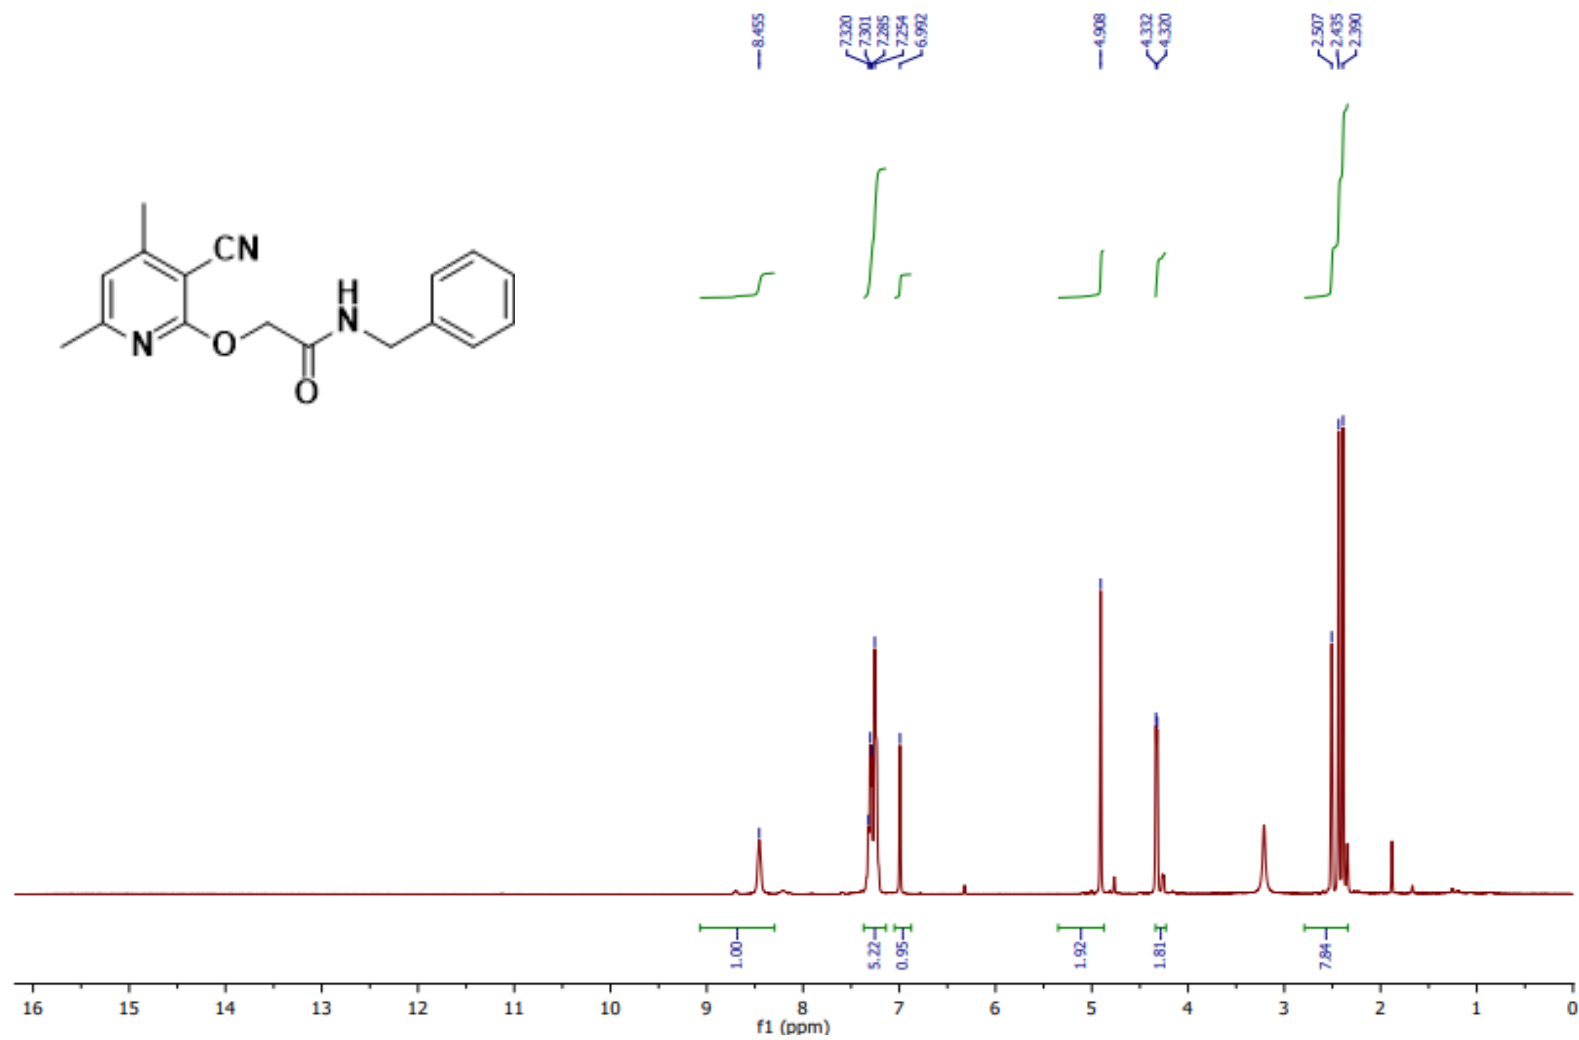

Fig. S24: <sup>1</sup>H-NMR (DMSO-d<sub>6</sub>) spectrum of compound 14

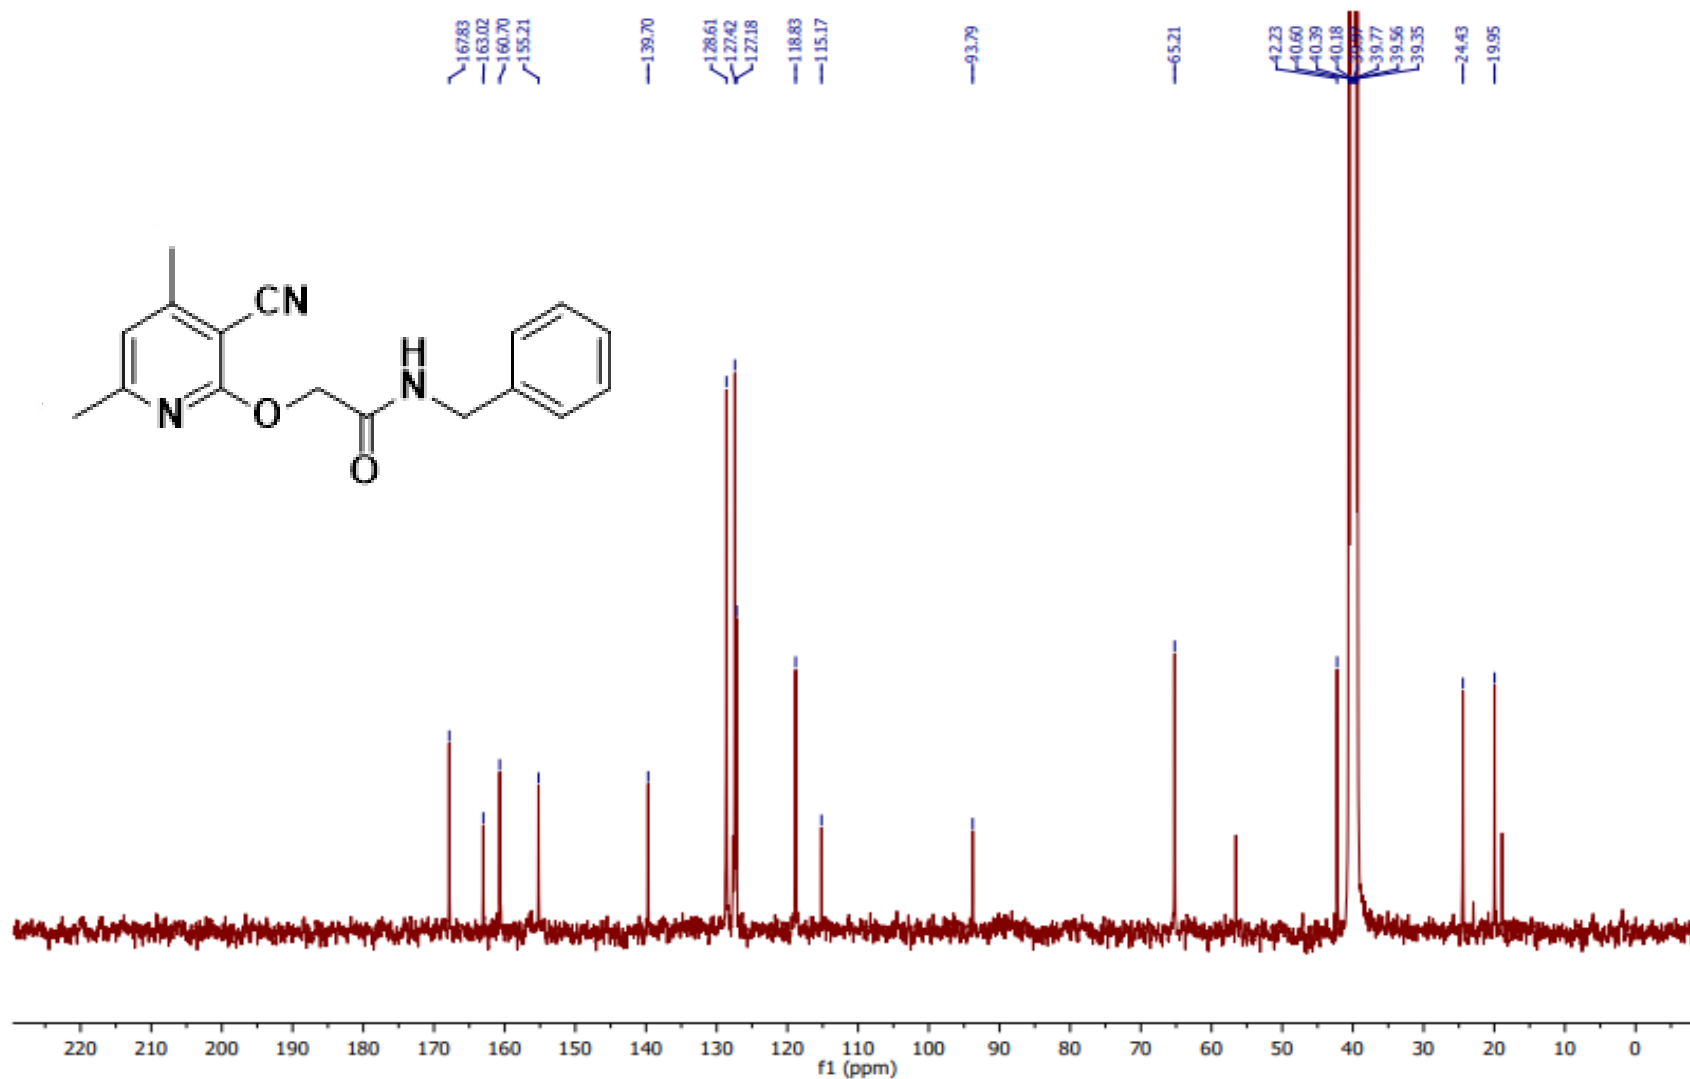

Fig.S25 :  $^{13}\text{C-NMR}$  (DMSO- $d_6$ ) spectrum of compound 14



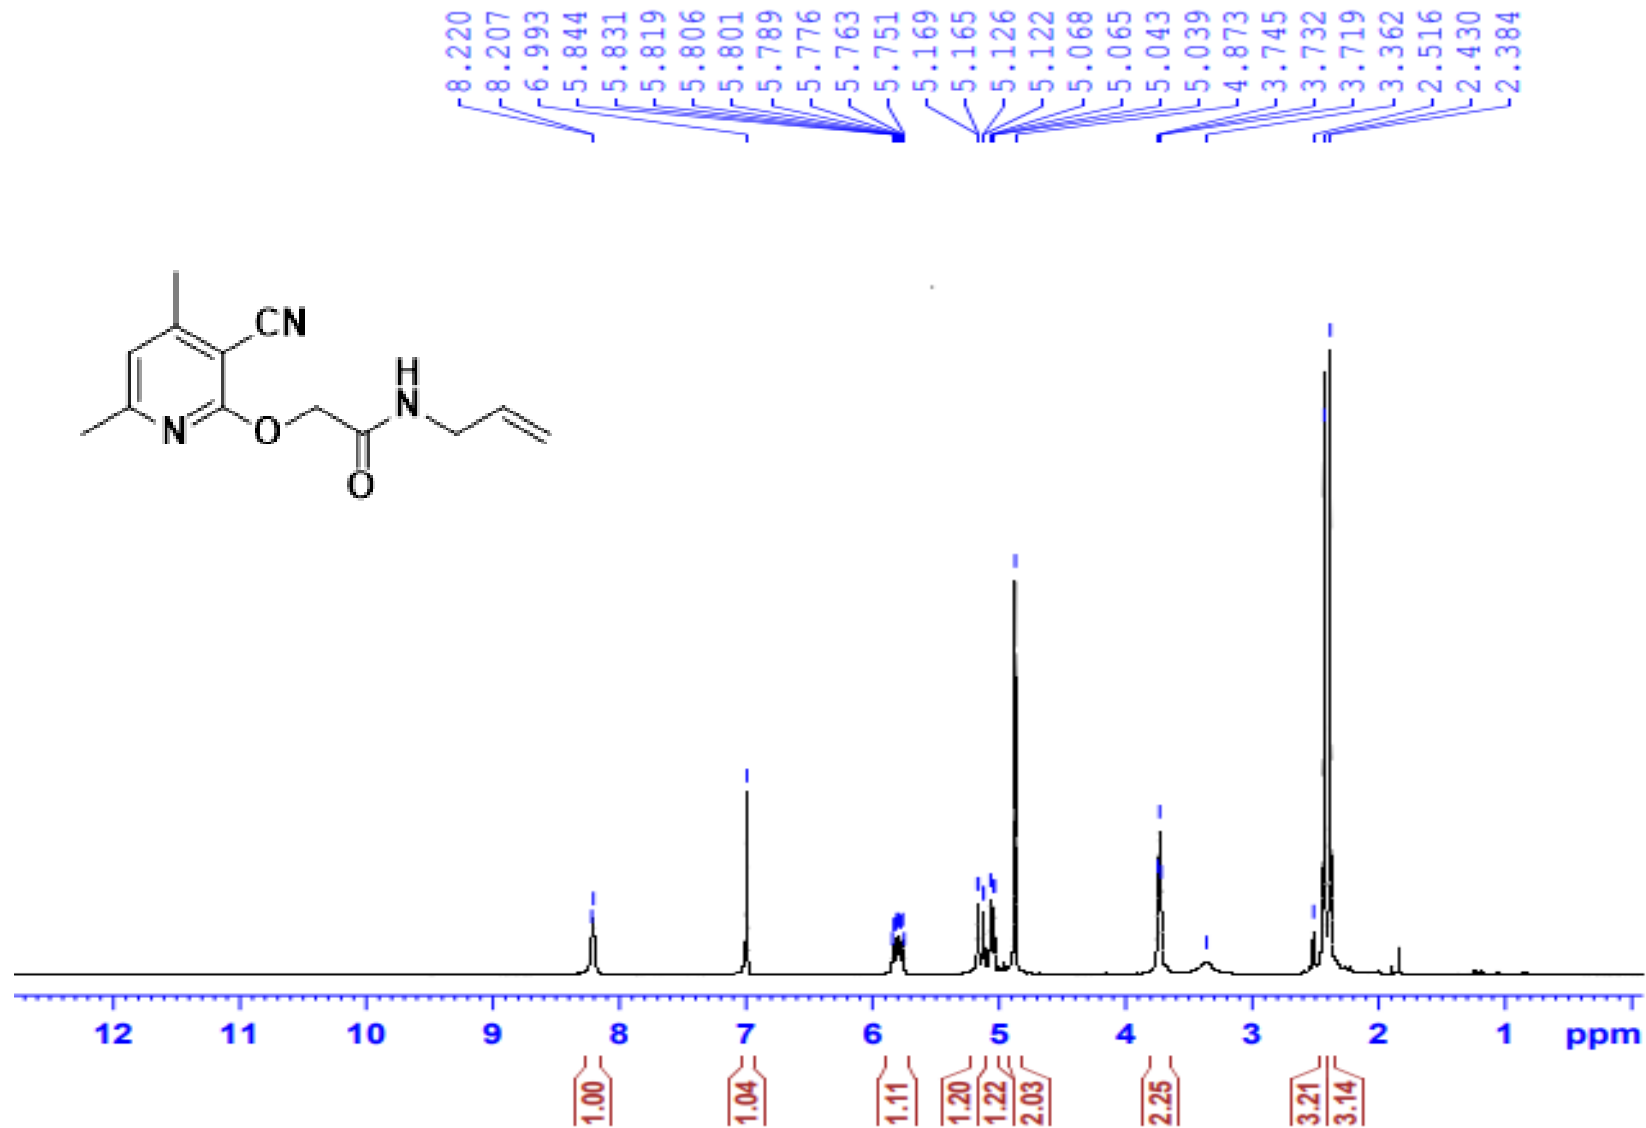

Fig.S26 : <sup>1</sup>H-NMR (DMSO-d<sub>6</sub>)spectrum of compound 15

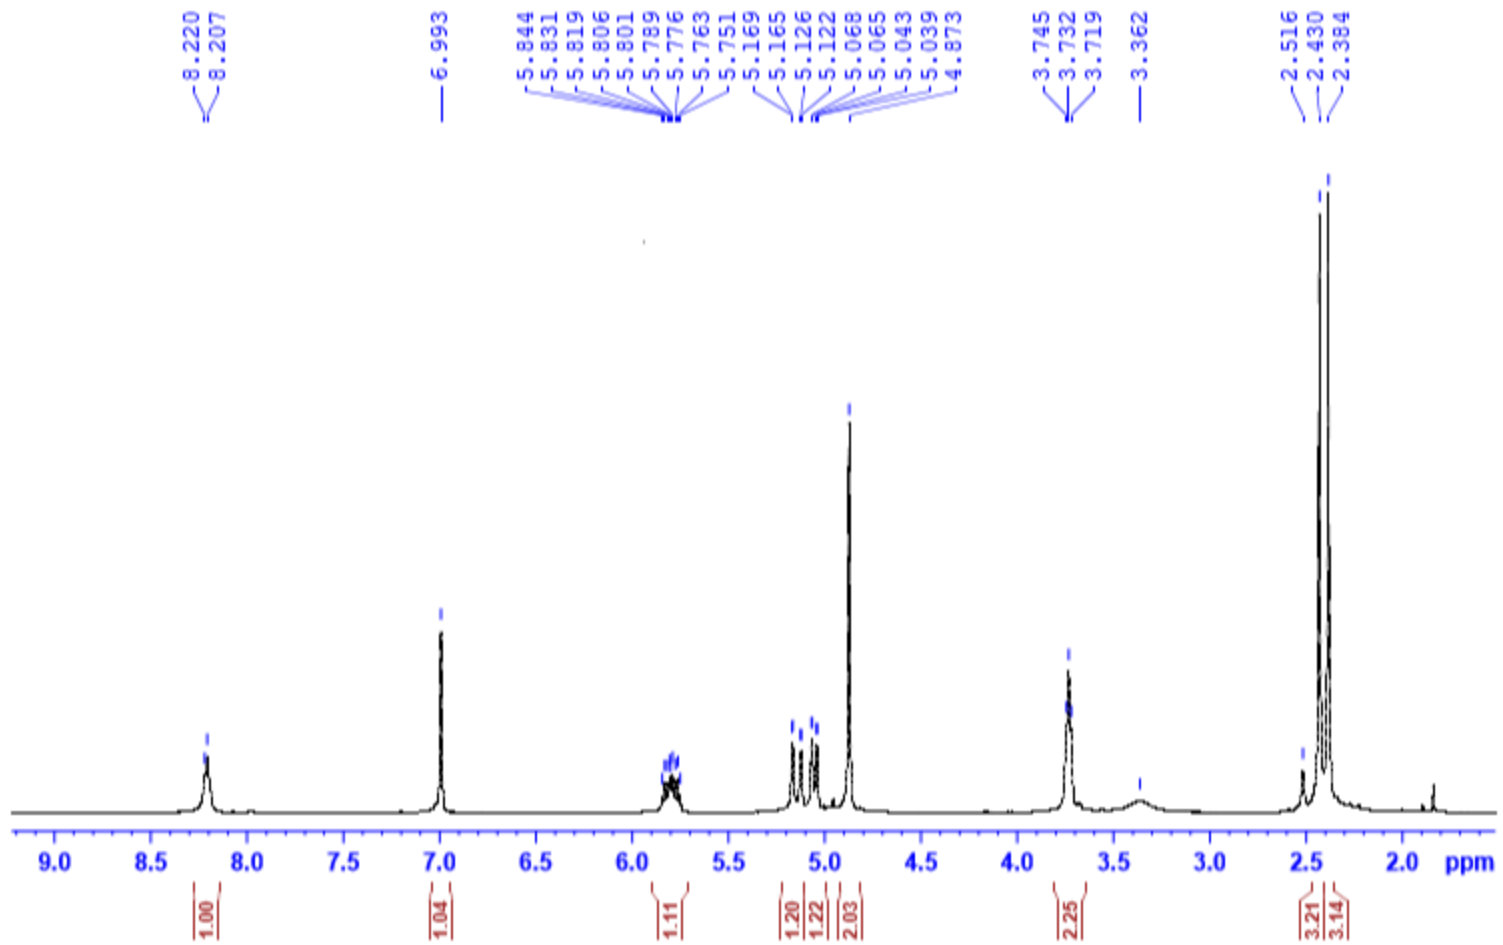

Zoomed image 1

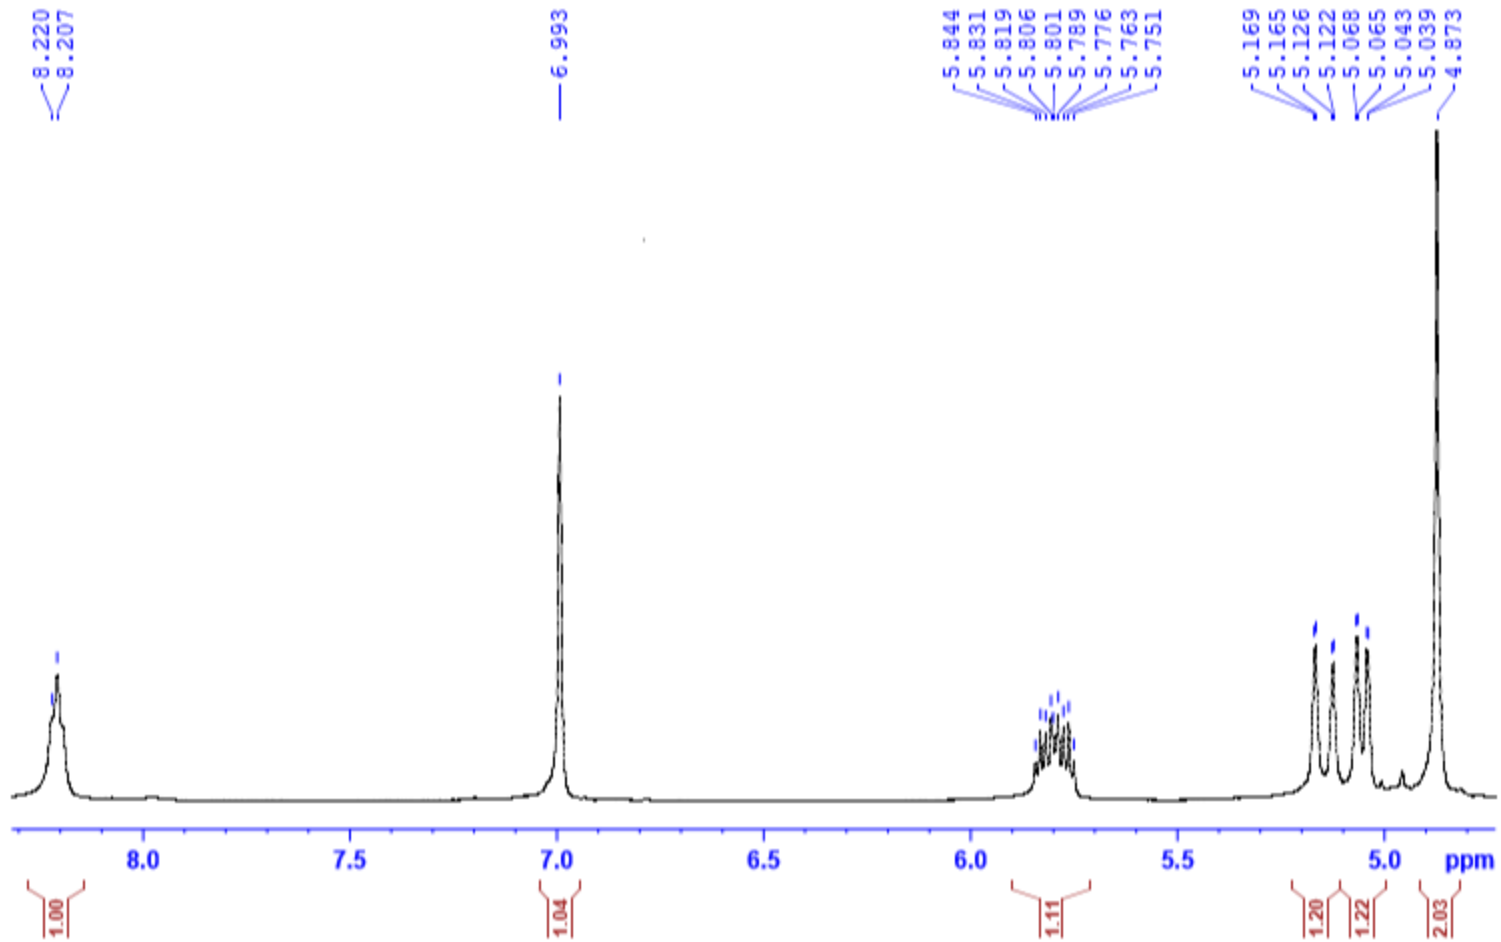

Zoomed image 2

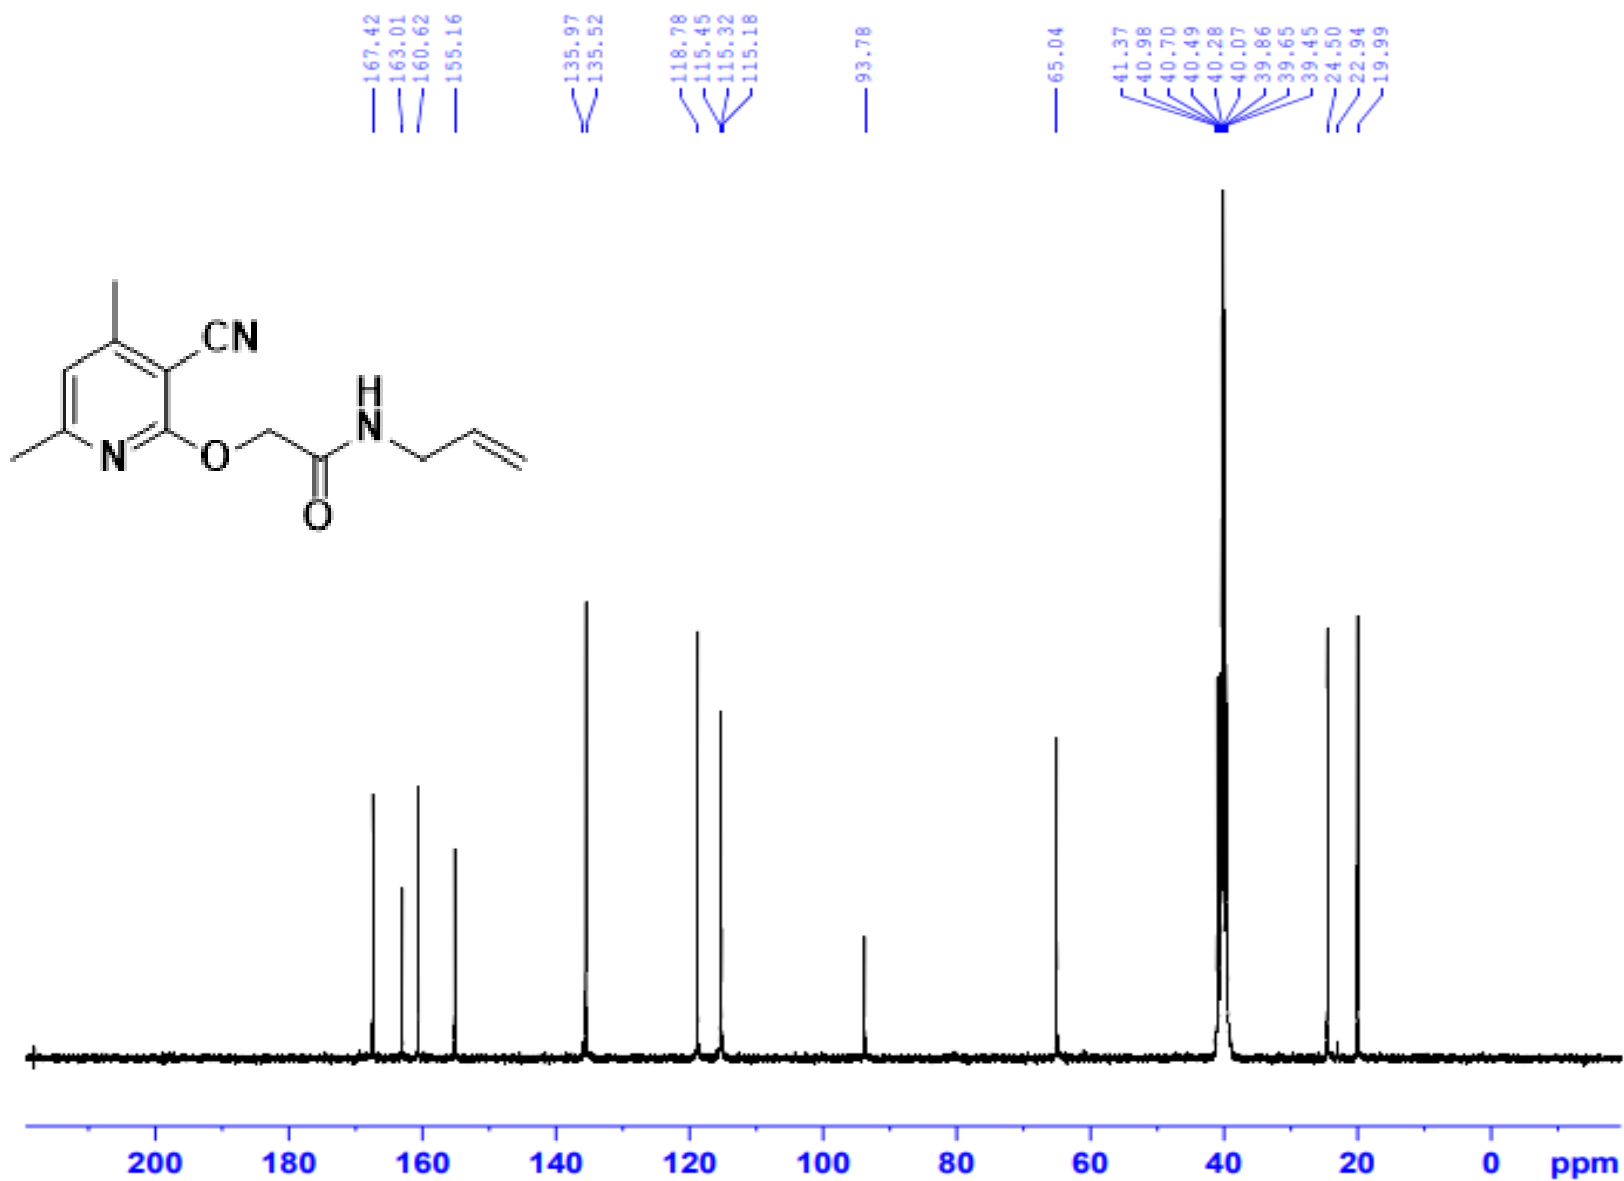

Fig.S27 :  $^{13}\text{C-NMR}$  (DMSO- $d_6$ ) spectrum of compound 15

## ***In Vivo* Assay**

### **Animals and tumor cell line**

Adult female Swiss albino mice purchased from Theodor Bilharzia Research Institute, Giza, Egypt, with an average body weight of (18-23) g was used. Mice were housed under constant conditions of 12 h light/dark cycle in a temperature under conditions of controlled humidity ( $22 \pm 2$  °C), with free access to standard laboratory mice food and water .All procedures related to care and maintenance of the animals were performed according to the international guiding principles for animal research and approved by Faculty of Science, Suez Canal University bioethics and animal ethics committee (Approval number REC220/2023).

Solid Ehrlich carcinoma (SEC) were got from the National Cancer Institute (Cairo University, Egypt). The tumor cell line was proliferated in mice through serial intraperitoneal (I.P.) transplantation of a volume of 0.2 mL physiological saline contains  $1 \times 10^6$  viable cells for 24 h. SEC cells were collected 7 days after I.P. implantation. The harvested cells were diluted with saline to obtain a concentration of  $5 \times 10^6$  viable SEC cells/mL. A volume of 0.2 mL saline contains  $1 \times 10^6$  SEC cells that were I.P. implanted into each normal mouse. SEC cells ( $1 \times 10^6$  tumor cells/mouse) were implanted subcutaneously into the right thigh of the hind limb.

The experimental animals were randomly divided into four groups. Group 1 served as the normal saline control (5 mL/kg B.Wt., I.P.). Group 2 served as the SEC control ( $1 \times 10^6$  cells/mouse). Group 3 served as the compound-treated group (5 mg/kg B.Wt., I.P.). Group 4 received the standard anticancer drug of Doxorubicin (DOX) (5 mg/kg BW, I.P.) and is considered as a reference control. Body weight and survival were recorded daily until the 24<sup>th</sup> day in both treated and control groups. At the end of experiment, the blood of each group was collected under light anesthesia for estimation of hematological and biochemical assays. The anesthetized animals were then sacrificed for evaluation of the antitumor activity and histopathological examination.

### **Antitumor potentiality**

It includes tumor volume, weight, and tumor inhibition ration (TIR%). Time interval measurements of tumor volume using digital Vernier caliper (Tricle Brand, Shanghai, China). Measure tumor length and width using clipper and then calculate tumor volume using formulations  $V = (L \times W \times W)/2$ , where V is tumor volume, W is tumor width, L is tumor length. While TIR% was calculated according to the following equation  $\frac{Tumor\ volume\ (Control) - Tumor\ volume\ (treated)}{Tumor\ volume\ (control)} \times 100$ .

### **Blood assays**

At the end of the experiment, animals from different groups were sacrificed, and blood samples were collected for determination of liver enzymes ALT, AST levels. Activities of aspartate aminotransferase (AST) and alanine aminotransferase (ALT) were evaluated using commercial kits (ELITech clinical systems, France). Serum albumin level was determined by kit purchased from STANBIO Company (USA).

### **Histopathological study**

Specimens of liver-sacrificed mice were fixed in 10% saline formalin. The fixed liver specimens were dehydrated in ascending series of ethyl alcohol and embedded in paraffin. Sections at 5 mm thicknesses were stained with hematoxylin and eosin and examined under light microscopy.

## References

- [1] M.S. Nafie, K. Arafa, N.K. Sedky, A.A. Alakhdar, R.K. Arafa, Triaryl dicationic DNA minor-groove binders with antioxidant activity display cytotoxicity and induce apoptosis in breast cancer, *Chemico-Biological Interactions*. 324 (2020) 109087. <https://doi.org/10.1016/j.cbi.2020.109087>.
- [2] M. Dicato, L. Plawny, M. Diederich, Anemia in cancer, *Annals of Oncology*. 21 (2010) vii167–vii172. <https://doi.org/10.1093/annonc/mdq284>.
- [3] H.S.A. ElZahabi, M.S. Nafie, D. Osman, N.H. Elghazawy, D.H. Soliman, A.A.H. EL-Helby, R.K. Arafa, Design, synthesis and evaluation of new quinazolin-4-one derivatives as apoptotic enhancers and autophagy inhibitors with potent antitumor activity, *European Journal of Medicinal Chemistry*. 222 (2021) 113609. <https://doi.org/10.1016/j.ejmech.2021.113609>.
- [4] A.T.A. Boraie, E.H. Eltamany, I.A.I. Ali, S.M. Gebriel, M.S. Nafie, Synthesis of new substituted pyridine derivatives as potent anti-liver cancer agents through apoptosis induction: In vitro, in vivo, and in silico integrated approaches, *Bioorganic Chemistry*. 111 (2021) 104877. <https://doi.org/10.1016/j.bioorg.2021.104877>.
